# Supplementary material for: Dual responsive pyridoxal-AHMT based fluorescent sensor towards zinc(ii) and mercury(ii) ions and its bioimaging application
Source: Royal Society of Chemistry journal article supplement (doi:10.1039/d3nj00890h), 2023-01-01
Supplement: d3nj00890h1.pdf [file d3nj00890h1.pdf]

## Supporting Information for

### **Dual responsive pyridoxal-AHMT based fluorescent sensor towards zinc(II) and mercury(II) ions and its bioimaging application**

Kettalu Ananthan Karthick<sup>a</sup>, Bhaskaran Shankar<sup>b</sup>, Santhalingam Gayathri<sup>c</sup>, Manikka Kubendran  
Aravind<sup>c</sup>, Balasubramaniam Ashokkumar<sup>c</sup>, Arunachalam Tamilselvi<sup>\*a</sup>

<sup>a</sup>*PG & Research Department of Chemistry, Thiagarajar College (Affiliated to Madurai Kamaraj  
University), Madurai 625 009, India*

<sup>b</sup>*Department of Chemistry, Thiagarajar College of Engineering, Madurai 625 015, India*

<sup>c</sup>*School of Biotechnology, Madurai Kamaraj University, Madurai 625 021, Tamil Nadu, India*

\*Email: [tamilselvi\\_chem@tcarts.in](mailto:tamilselvi_chem@tcarts.in)

| S. No. | Figures and tables Content                                                                                                                                                                                                                                                                                                                                                                                  | Page No. |
|--------|-------------------------------------------------------------------------------------------------------------------------------------------------------------------------------------------------------------------------------------------------------------------------------------------------------------------------------------------------------------------------------------------------------------|----------|
| 1.     | Materials and Methods, Details of Solid state diffuse reflectance (UV-DRS) study, Solid state emission study, Job plot analysis, Quantum yield determination, Photoluminescence lifetime measurements, Hirshfeld surface analysis, MTT assay, and Benesi-Hildebrand (B-H) method                                                                                                                            | S5-S8    |
| 2.     | <b>Fig. S1.</b> UV-Vis spectrum of probe, <b>L</b> (50 $\mu\text{M}$ ) in HEPES buffered (pH = 8.0) (DMSO:water (1:1, v/v)).                                                                                                                                                                                                                                                                                | S9       |
| 3.     | <b>Fig. S2.</b> Emission spectrum of probe, <b>L</b> (50 $\mu\text{M}$ ) in HEPES buffered (pH = 8.0) (DMSO:water (1:1, v/v)); $\lambda_{\text{ex}} = 336 \text{ nm}$ .                                                                                                                                                                                                                                     |          |
| 4.     | <b>Fig. S3.</b> FT-IR spectra of (a) <b>L</b> (b) <b>L</b> + <b>Zn<sup>2+</sup></b> and (c) <b>L</b> + <b>Hg<sup>2+</sup></b> .                                                                                                                                                                                                                                                                             | S10      |
| 5.     | <b>Fig. S4.</b> <sup>1</sup> H NMR spectrum of probe, <b>L</b> (DMSO- <i>d</i> 6, 400 MHz).                                                                                                                                                                                                                                                                                                                 |          |
| 6.     | <b>Fig. S5.</b> <sup>13</sup> C NMR spectrum of probe, <b>L</b> (DMSO- <i>d</i> 6, 100 MHz).                                                                                                                                                                                                                                                                                                                | S11      |
| 7.     | <b>Fig. S6.</b> Q-TOF HRMS spectrum of probe, <b>L</b> .                                                                                                                                                                                                                                                                                                                                                    |          |
| 8.     | <b>Fig. S7.</b> Stick model of <b>L</b> showed the intra and intermolecular H-bond distance.                                                                                                                                                                                                                                                                                                                | S12      |
| 9.     | <b>Fig. S8.</b> TGA/DTA plots of (a) <b>L</b> (b) <b>ZnL<sub>2</sub></b> and (c) <b>Hg<sub>2</sub>L<sub>2</sub></b> .                                                                                                                                                                                                                                                                                       |          |
| 10.    | <b>Fig. S9.</b> Crystal packing view of <b>L</b> showing the existence of aromatic $\pi$ - $\pi$ interactions in the crystal (lattice water molecules and hydrogens are omitted for clarity).                                                                                                                                                                                                               | S13      |
| 11.    | <b>Fig. S10.</b> Comparison of powder XRD pattern of experimental with simulated pattern (generated from CIF file using Mercury 3.0 software package).                                                                                                                                                                                                                                                      |          |
| 12.    | <b>Fig. S11.</b> Selective absorbance response of <b>L</b> (50 $\mu\text{M}$ ) in HEPES buffered (pH = 8.0) (DMSO:water (1:1, v/v)) towards competitive metal ions.                                                                                                                                                                                                                                         | S14      |
| 13.    | <b>Fig. S12.</b> Fluorescence spectra of <b>L</b> (50 $\mu\text{M}$ ) in various solvents; $\lambda_{\text{ex}} = 336 \text{ nm}$ .                                                                                                                                                                                                                                                                         |          |
| 14.    | <b>Fig. S13.</b> Effect of pH on the fluorescence intensity of probe, <b>L</b> (50 $\mu\text{M}$ ).                                                                                                                                                                                                                                                                                                         | S15      |
| 15.    | <b>Fig. S14.</b> Effect of pH on the fluorescence intensity of probe, <b>L</b> (50 $\mu\text{M}$ ) in the absence and presence of <b>Zn<sup>2+</sup></b> (25 $\mu\text{M}$ ).                                                                                                                                                                                                                               |          |
| 16.    | <b>Fig. S15.</b> Effect of pH on the fluorescence intensity of probe, <b>L</b> (50 $\mu\text{M}$ ) in the absence and presence of <b>Hg<sup>2+</sup></b> (50 $\mu\text{M}$ ).                                                                                                                                                                                                                               | S16      |
| 17.    | <b>Fig. S16.</b> Fluorescence spectra of <b>L</b> (50 $\mu\text{M}$ ) in various ratios (v/v) of DMSO and water in HEPES buffered medium (pH = 8.0).                                                                                                                                                                                                                                                        |          |
| 18.    | <b>Fig. S17.</b> Normalised excitation and emission spectra of probe, <b>L</b> ( $\lambda_{\text{ex}} = 309, 336 \text{ and } 398 \text{ nm}$ ).                                                                                                                                                                                                                                                            | S17      |
| 19.    | <b>Fig. S18.</b> UV-Vis titration of <b>L</b> (50 $\mu\text{M}$ ) in HEPES buffered (pH = 8.0) (DMSO:water (1:1, v/v)) medium upon addition of <b>Zn<sup>2+</sup></b> ; gradually increasing [ <b>Zn<sup>2+</sup></b> ] from 0 to 25 $\mu\text{M}$ , excess addition till 35 $\mu\text{M}$ . Inset: The plot of absorbance intensity at 405 and 336 nm versus concentration of <b>Zn<sup>2+</sup></b> .     |          |
| 20.    | <b>Fig. S19.</b> UV-Vis titration of <b>L</b> (50 $\mu\text{M}$ ) in HEPES buffered (pH = 8.0) (DMSO:water (1:1, v/v)) medium upon addition of <b>Hg<sup>2+</sup></b> ; gradually increasing [ <b>Hg<sup>2+</sup></b> ] from 0 to 50 $\mu\text{M}$ , and excess addition till 60 $\mu\text{M}$ . Inset: The plot of absorbance intensity at 388 and 336 nm versus concentration of <b>Hg<sup>2+</sup></b> . | S18      |
| 21.    | <b>Fig. S20.</b> Illustration of keto-enol tautomerism <i>via</i> six-membered transition state.                                                                                                                                                                                                                                                                                                            |          |
| 22.    | <b>Fig. S21.</b> Benesi-Hildebrand (B-H) plot of fluorescence changes at 440 nm upon addition of <b>Zn<sup>2+</sup></b> ion (linearity plotted using the addition from 10 $\mu\text{M}$ to 25 $\mu\text{M}$ of <b>Zn<sup>2+</sup></b> to <b>L</b> ).                                                                                                                                                        | S19      |
| 23.    | <b>Fig. S22.</b> Benesi-Hildebrand (B-H) plot of fluorescence changes at 478 nm upon addition of <b>Hg<sup>2+</sup></b> ion (linearity plotted using the addition from 10 $\mu\text{M}$ to 50 $\mu\text{M}$ of <b>Hg<sup>2+</sup></b> to <b>L</b> ).                                                                                                                                                        |          |

|     |                                                                                                                                                                                                                                                                                                                                                                                                                       |            |
|-----|-----------------------------------------------------------------------------------------------------------------------------------------------------------------------------------------------------------------------------------------------------------------------------------------------------------------------------------------------------------------------------------------------------------------------|------------|
| 24. | <b>Fig. S23.</b> Stern-Volmer plot of fluorescence changes at 478 nm upon addition of $\text{Hg}^{2+}$ ion (linearity plotted using the addition from 25 $\mu\text{M}$ to 50 $\mu\text{M}$ of $\text{Hg}^{2+}$ to <b>L</b> ).                                                                                                                                                                                         | <b>S20</b> |
| 25. | <b>Fig. S24.</b> Job's plot for (a) $\text{ZnL}_2$ and (b) $\text{Hg}_2\text{L}_2$ formation using emission spectral data of ( $\lambda_{\text{ex}} = 336 \text{ nm}$ ).                                                                                                                                                                                                                                              |            |
| 26. | <b>Fig. S25.</b> Determination of LOD (a) Linear regressive plot of <b>L</b> with $\text{Zn}^{2+}$ ion concentration from 5 to 25 $\mu\text{M}$ (b) Linear regressive plot of <b>L</b> with $\text{Hg}^{2+}$ ion concentration from 5 to 50 $\mu\text{M}$ .                                                                                                                                                           | <b>S21</b> |
| 27. | <b>Fig. S26.</b> (a) Time course measurement study of <b>L</b> (60 $\mu\text{M}$ ) in the presence and absence of $\text{Zn}^{2+}$ and $\text{Hg}^{2+}$ (60 $\mu\text{M}$ ); The full spectrum viewed and labeled as (b), (c) and (d) are 3D plot of interval scan measurements of <b>L</b> , <b>L</b> + $\text{Zn}^{2+}$ and <b>L</b> + $\text{Hg}^{2+}$ in HEPES buffered (pH = 8.0) (DMSO:water (1:1, v/v)) medium | <b>S22</b> |
| 28. | <b>Fig. S27.</b> Fluorescence Interference study of <b>L</b> in the presence of competitive metal ions (1 equiv.) with and without $\text{Zn}^{2+}$ ion (1.0 equiv.) HEPES buffered (pH = 8.0) (DMSO:water (1:1, v/v)).                                                                                                                                                                                               |            |
| 29. | <b>Fig. S28.</b> Fluorescence Interference study of <b>L</b> in the presence of competitive metal ions (1 equiv.) with and without $\text{Hg}^{2+}$ ion (1 equiv.) HEPES buffered (pH = 8.0) (DMSO:water (1:1, v/v)).                                                                                                                                                                                                 | <b>S23</b> |
| 30. | <b>Fig. S29.</b> Fluorescence spectra recorded in HEPES buffered (pH = 8.0) (DMSO:water (1:1, v/v)) medium; (a) Reversibility of <b>L</b> + $\text{Zn}^{2+}$ with EDTA (b) Reversibility of <b>L</b> + $\text{Hg}^{2+}$ with EDTA.                                                                                                                                                                                    |            |
| 31. | <b>Fig. S30.</b> Recovery cycles of (a) <b>L</b> (50 $\mu\text{M}$ ) upon alternative addition of $\text{Zn}^{2+}$ (1 equiv.) and EDTA (1 equiv.); (b) <b>L</b> (50 $\mu\text{M}$ ) upon alternative addition of $\text{Zn}^{2+}$ (1 equiv.) and EDTA (1 equiv.)                                                                                                                                                      |            |
| 32. | <b>Fig. S31.</b> Partial $^1\text{H}$ NMR spectral titration of probe with successive addition of $\text{Zn}(\text{OAc})_2$ in DMSO- <i>d</i> <sub>6</sub> for zoomed view of aromatic –OH and exocyclic –NH signal changes.                                                                                                                                                                                          | <b>S24</b> |
| 33. | <b>Fig. S32.</b> Partial $^1\text{H}$ NMR spectral titration of probe with successive addition of $\text{Zn}(\text{OAc})_2$ in DMSO- <i>d</i> <sub>6</sub> for zoomed view of endocyclic –NH signal changes.                                                                                                                                                                                                          |            |
| 34. | <b>Fig. S33.</b> Partial $^1\text{H}$ NMR spectral titration of probe with successive addition of $\text{Zn}(\text{OAc})_2$ in DMSO- <i>d</i> <sub>6</sub> for zoomed view of azomethine signal changes.                                                                                                                                                                                                              | <b>S25</b> |
| 35. | <b>Fig. S34.</b> Partial $^1\text{H}$ NMR spectral titration of probe with successive addition of $\text{Zn}(\text{OAc})_2$ in DMSO- <i>d</i> <sub>6</sub> for zoomed view of aliphatic –OH and –NH <sub>2</sub> signal changes.                                                                                                                                                                                      |            |
| 36. | <b>Fig. S35.</b> Partial $^1\text{H}$ NMR spectral titration of probe with successive addition of $\text{HgCl}_2$ in DMSO- <i>d</i> <sub>6</sub> for zoomed view of endocyclic –NH signal changes.                                                                                                                                                                                                                    | <b>S26</b> |
| 37. | <b>Fig. S36.</b> Partial $^1\text{H}$ NMR spectral titration of probe with successive addition of $\text{HgCl}_2$ in DMSO- <i>d</i> <sub>6</sub> for zoomed view of exocyclic –NH and Ar-OH signal changes.                                                                                                                                                                                                           |            |
| 38. | <b>Fig. S37.</b> $^{13}\text{C}$ NMR spectra of probe ( <b>L</b> ) with 1.0 equivalent addition of $\text{HgCl}_2$ in DMSO- <i>d</i> <sub>6</sub> (100 MHz) Note; the asterisk symbol * indicated that trace amount of methanol solvent.                                                                                                                                                                              | <b>S27</b> |
| 39. | <b>Fig. S38.</b> Possible tautomeric forms of probe ( <b>L</b> ).                                                                                                                                                                                                                                                                                                                                                     |            |
| 40. | <b>Fig. S39.</b> Frontier molecular orbital diagram of <b>L</b> , $\text{ZnL}_2$ and $\text{Hg}_2\text{L}_2$ in gas phase level.                                                                                                                                                                                                                                                                                      | <b>S28</b> |
| 41. | <b>Fig. S40.</b> Frontier molecular orbital diagram of <b>L</b> , $\text{ZnL}_2$ and $\text{Hg}_2\text{L}_2$ in water medium.                                                                                                                                                                                                                                                                                         |            |
| 42. | <b>Fig. S41.</b> Frontier molecular orbital diagram of <b>L</b> , $\text{ZnL}_2$ and $\text{Hg}_2\text{L}_2$ in DMSO medium.                                                                                                                                                                                                                                                                                          |            |
| 43. | <b>Fig. S42.</b> Calculated UV-Vis spectra (red) with oscillator strengths (blue) of (a) <b>L</b> in water medium (b) <b>L</b> in DMSO medium (c) $\text{ZnL}_2$ in water medium (d) $\text{ZnL}_2$ in DMSO medium (e) $\text{Hg}_2\text{L}_2$ in water medium and (f) $\text{Hg}_2\text{L}_2$ in DMSO medium; The black colour represents the experimental UV-Vis results.                                           | <b>S29</b> |

|     |                                                                                                                                                                                                                                                     |                    |
|-----|-----------------------------------------------------------------------------------------------------------------------------------------------------------------------------------------------------------------------------------------------------|--------------------|
| 44. | <b>Fig. S43.</b> Solid state UV-DRS spectra of <b>L</b> , <b>L + Zn(II)</b> and <b>L + Hg(II)</b> , Inset: Kubelka–Munk (K–M) plot used for band gap calculations.                                                                                  | <b>S30</b>         |
| 45. | <b>Fig. S44.</b> Hirshfeld surfaces mapped over (a) $d_i$ ; (b) $d_e$ ; (c) $d_{norm}$ ; (d) shape index; and (e) curvedness for probe ( <b>L</b> ).                                                                                                | <b>S31</b>         |
| 46. | <b>Fig. S45.</b> Two-dimensional fingerprint (2D) plots of probe ( <b>L</b> ) generated from Crystal Explore software.                                                                                                                              |                    |
| 47. | <b>Fig. S46.</b> Determination of cytotoxicity of <b>L</b> on A549 cells by MTT assay.                                                                                                                                                              | <b>S32</b>         |
| 48. | <b>Fig. S47.</b> Comparison plot of normalized absorbance and emission spectra of <b>L</b> , <b>L + Zn<sup>2+</sup></b> and <b>L + Hg<sup>2+</sup></b> (Stokes shift analysis).                                                                     |                    |
| 49. | <b>Table S1.</b> FT-IR assignments of <b>L</b> , <b>L + Zn<sup>2+</sup></b> and <b>L + Hg<sup>2+</sup></b> .                                                                                                                                        | <b>S33&amp;S34</b> |
| 50. | <b>Table S2.</b> Crystal data and structure refinement for <b>L</b> .                                                                                                                                                                               |                    |
| 51. | <b>Table S3.</b> Bond lengths [Å] and angles [°] for <b>L</b> .                                                                                                                                                                                     | <b>S34-S36</b>     |
| 52. | <b>Table S4.</b> Summarized $\lambda_{max}$ (nm) emission data of <b>L</b> in various solvents.                                                                                                                                                     | <b>S37</b>         |
| 53. | <b>Table S5.</b> Summarized $\lambda_{max}$ (nm) emission data of <b>L</b> in various ratios (v/v) of DMSO and water in HEPES buffered medium (pH = 8.0).                                                                                           |                    |
| 54. | <b>Table S6.</b> Solid and solution state fluorescence lifetime data of <b>L</b> , <b>ZnL<sub>2</sub></b> and <b>Hg<sub>2</sub>L<sub>2</sub></b>                                                                                                    |                    |
| 55. | <b>Table S7.</b> The Cartesian coordinates of <b>L</b> (enol-thione), <b>ZnL<sub>2</sub></b> and <b>Hg<sub>2</sub>L<sub>2</sub></b> calculated from Gaussian-09 at B3LYP computational level using IEF-PCM calculation ( <b>water as solvent</b> ). | <b>S38-S41</b>     |
| 56. | <b>Table S8.</b> The Cartesian coordinates of <b>L</b> (enol-thione), <b>ZnL<sub>2</sub></b> and <b>Hg<sub>2</sub>L<sub>2</sub></b> calculated from Gaussian-09 at B3LYP computational level using IEF-PCM calculation ( <b>DMSO as solvent</b> ).  |                    |
| 57. | <b>Table S9.</b> Major UV-Vis electronic transitions and corresponding orbital contributions for <b>L</b> , <b>ZnL<sub>2</sub></b> and <b>Hg<sub>2</sub>L<sub>2</sub></b> .                                                                         | <b>S42</b>         |
| 58. | <b>Table S10.</b> Selected Frontier molecular orbitals HOMO-LUMO diagram of probe ( <b>L</b> ) in water and DMSO medium.                                                                                                                            | <b>S43&amp;S44</b> |
| 59. | <b>Table S11.</b> Selected Frontier molecular orbitals HOMO-LUMO diagram of zinc(II) complex ( <b>ZnL<sub>2</sub></b> ) in water and DMSO medium                                                                                                    | <b>S45-S51</b>     |
| 60. | <b>Table S12.</b> Selected Frontier molecular orbitals HOMO-LUMO diagram of mercury(II) complex ( <b>Hg<sub>2</sub>L<sub>2</sub></b> ) in water and DMSO medium.                                                                                    |                    |
| 61. | <b>Table S13.</b> Comparison with recent literature results.                                                                                                                                                                                        |                    |
| 62. | <b>Reference</b>                                                                                                                                                                                                                                    | <b>S52&amp;S53</b> |

## Materials and Methods

Pyridoxal hydrochloride, 4-amino-3-hydrazinyl-1,2,4-triazole-5-thione and chloride salt of metals ( $\text{Ag}^+$ ,  $\text{Al}^{3+}$ ,  $\text{Ba}^{2+}$ ,  $\text{Cd}^{2+}$ ,  $\text{Cu}^{2+}$ ,  $\text{Co}^{2+}$ ,  $\text{Fe}^{3+}$ ,  $\text{Hg}^{2+}$ ,  $\text{K}^+$ ,  $\text{Mn}^{2+}$ ,  $\text{Mg}^{2+}$ ,  $\text{Ni}^{2+}$ ,  $\text{Na}^+$ ,  $\text{Pb}^{2+}$ ,  $\text{Pd}^{2+}$ ,  $\text{Sr}^{2+}$  and  $\text{Zn}^{2+}$ ) were procured from commercial sources and utilized for synthesis and fluorescence sensor studies. All the organic solvents and double distilled water of spectroscopic grade used for carrying out the photophysical studies. The probe was purified with silica gel column (230–400 mesh) and crystallized in binary mixtures of methanol with water. All the sensor studies were executed in HEPES buffer (pH = 8.0) (DMSO:water (1:1, v/v)) mixture. Absorbance spectral data measured on spectrophotometer (Jasco UV-730) and Solid and solution state emission spectra were collected using spectrofluorometer (Jasco FP-8300 model). The solid state UV-Vis Diffuse Reflectance spectra (DRS) were measured with a spectrophotometer (Jasco UV, Model V-770). The solid and solution state fluorescence decay analysis were performed on Horiba Jobin Yvon Fluorocube life time system. FT-IR spectral data collected on Jasco FT/IR-4700typeA spectrometer.  $^1\text{H}$  and  $^{13}\text{C}$  NMR spectra were recorded on a Bruker Avance Onebay 400 MHz FT-NMR spectrometer.  $^1\text{H}$  NMR titration was performed using DMSO-*d*6 solvents by keeping total volume of 600  $\mu\text{L}$ . The zinc(II) acetate and mercury(II) chloride salts were used as metal ion sources. HRMS/Q-TOF spectrometer (Agilent make; 6200 series) was utilized to collect mass spectral data. Single crystal X-ray diffraction data was collected on a Bruker D8 Quest diffractometer. Thermogravimetric (TGA/DTA) analysis was performed on NJA – STA 2500 thermal analyser Regulus instrument. The pH dependency studies were executed on Labtech digital pH meter.

### Solid state diffuse reflectance (UV-DRS) study

The fine powdered samples of **L**, **L + Zn<sup>2+</sup>** and **L + Hg<sup>2+</sup>** were carefully filled with solid sample cell holder. Before measuring UV-DRS, baseline is corrected and calibrated with barium sulphate standard. The correlation between absorption co-efficient ( $\alpha$ ) and optical band gap ( $E_g$ ) is given by the equation (1),

$$\alpha E \approx A_1(E - E_g)^2 \quad \dots(1)$$

Where,  $E = h\nu$  is photon energy,  $A_1$  is a constant

Kubelka–Munk (K–M)<sup>[1]</sup> equation (2) is given by,

$$F(R) = \frac{(1 - R^2)}{2R} = \frac{k}{s} \quad \dots(2)$$

Where, R is experimentally observed reflectance, k is molar absorption co-efficient and s is scattering co-efficient. The scattering co-efficient is independent on the wavelength of incident light and using equation (1) & (2), the following equation (3) can be written as follows,

$$[h\nu F(R)]^{\frac{1}{2}} = A_1[h\nu - E_g] \quad \dots(3)$$

The plot Kubelka–Munk (K–M) function  $[h\nu F(R)]^{1/2}$  versus photon energy is known as Tauc plot.<sup>[2]</sup> The optical band gap energy ( $E_g$ ) of **L**, **L + Zn<sup>2+</sup>** and **L + Hg<sup>2+</sup>** were determined by extrapolating the linear fitted region to  $[h\nu F(R)]^{1/2} = 0$ .

### Solid state emission study

Powdered forms of **L**, **L + Zn<sup>2+</sup>** and **L + Hg<sup>2+</sup>** were carefully load on FDA-808 solid sample holding block (FP-8300 model) and fix the excitation wavelength ( $\lambda_{ex} = 336$  nm) to obtain the solid state emission. Normalise the solid state fluorescence intensity of **L**, **L + Zn<sup>2+</sup>** and **L + Hg<sup>2+</sup>** for comparing the wavelength shift.

### Job's plot analysis

Stock solutions of probe (**L**) and metal ions (**Zn<sup>2+</sup>** and **Hg<sup>2+</sup>**) were made ( $5 \times 10^{-6}$  M) in HEPES buffered (pH = 8.0) (DMSO:water (1:1, v/v)) for Job's plot analysis. The emission for the molar ratio between **L** and metal ion (**Zn<sup>2+</sup>** and **Hg<sup>2+</sup>**) ranging from 0 to 0.9 were measured and plotted between molar ratio and emission intensity.<sup>[3]</sup>

### Photoluminescence quantum yield calculations

The relative standard method<sup>[4]</sup> applied for calculating quantum yield (equation (4)).

$$\phi_s = \phi_{ref} \left( \frac{I_s}{I_{ref}} \right) \left( \frac{A_{ref}}{A_s} \right) \left( \frac{\eta_s^2}{\eta_{ref}^2} \right) \quad \dots(4)$$

Where  $\phi_s$  and  $\phi_{ref}$  are the quantum yields of unknown sample and the standard (quinine sulphate:  $\phi_{ref} = 0.546$ ) respectively,  $I_s$  and  $I_{ref}$  are the area of integrated fluorescence intensities,  $A_s$  and  $A_{ref}$  are the optical density for the sample and standard,  $\eta_s$  and  $\eta_{ref}$  are the refractive indices of the solvents

## Solid and solution state fluorescence lifetime measurement

Fluorescence lifetime decay measurement was carried out on Horiba Jobin Yvon M/S Fluorocube - Lifetime system, employed with time correlated single photon counting (TCSPC) experiment. The suitable excitation wavelength ( $\lambda_{\text{ex}} = 336 \text{ nm}$ ) was studied in steady state emission, we have used pulsed-Diode Nano-LED of 340 nm as excitation signal source for both solid and solution state (HEPES buffered (pH = 8.0) (DMSO:water (1:1, v/v))) lifetime decay. The pulse repetition rate of TCSPC was set as 1 MHz. The detector response for the 340 nm light source was 1.122 and 1.117 ns for solid and solution state lifetime decay respectively. The full width-half maximum (FWHM) of the prompt is 10.0473 ch (solid) and 9.9964 ch (solution). The prompt time calibration is  $1.117 \times 10^{-10} \text{ sec/ch}$  which is used to convert channels to nanoseconds. The instrument response function (IRF) was measured with a scatterer LUDOX AS40 colloidal silica medium. The fluorescence decay data fitting was analysed by IBH (DAS-6) software. A value of exponential fits ( $\chi^2$ ) acceptable range was further judged by the symmetrical distribution of the residuals. The three exponentials decay gives three lifetimes; we have calculated and reported average lifetime for both solid and solution state measurements.

## Hirshfeld surface analysis

Hirshfeld surface analysis was used to investigate close contacts in molecular packing, intermolecular atomic interactions and its contribution percentage within the crystal structure.<sup>[51]</sup> The surface mapping and 2D fingerprint plots (plot of  $d_i$  versus  $d_e$ ) were generated from the single crystal X-ray data of probe (**L**) on Crystal Explorer 3.1 software package. The various graphical views,  $d_e$  (distance from a point of surface to the nearest nucleus outside the surface),  $d_i$  (distance from a point of surface to the nearest nucleus inside the surface), normalised  $d_{\text{norm}}$  (normalised distance), shape-index, and curvedness were generated in order to understand intermolecular interactions.

## MTT assay

The cell viability of **L** was investigated using standard MTT (3-(4,5-dimethylthiazol-2-yl)-2,5-diphenyltetrazolium bromide) assay on A549 cell line. Cells were seeded in 96-well plate with an initial seeding density of  $0.01 \times 10^6$  cells per well and incubated in CO<sub>2</sub> incubator in

DMEM media with 10% FBS for 16 h. After incubation, cells were treated with varying concentrations of **L** from 10 µg to 140 µg (33.70 to 471.80 µM) for 12 h. Following that, cells were washed twice with phosphate buffer and treated with MTT for 4 h. After which, MTT was removed and 90 µL of DMSO was added and the cells were further incubated for 15 min. A purple colour production was observed and the optical density (OD) was measured in a microtiter plate reader at 570 nm to determine IC<sub>50</sub> value, with untreated cells taken as controls.

### **Benesi-Hildebrand (B-H) method**

The binding constant ( $K_b$ ) was estimated using Benesi-Hildebrand equation<sup>[6]</sup> based on fluorescence titration data. The inverse of the slope in linear regressive plot equals to binding constant ( $K_b$ ) for  $Zn^{2+}$  complexation with probe. The mathematical expression of Benesi-Hildebrand equation (for 2:1 stoichiometric) for the fluorescence titration is shown in below equation (5),

$$\frac{F_{max}-F_0}{F-F_0} = \frac{1}{K_b[Zn^{2+}]^2} \quad \dots(5)$$

Where,  $F_0$  is fluorescence intensity of molecular sensor in the absence of  $Zn^{2+}$  ion.  $F$  is fluorescence intensity of molecular sensor in the presence of  $Zn^{2+}$  ion.  $F_{max}$  is maximum fluorescence intensity of molecular sensor at the saturation level. The Benesi-Hildebrand equation for 1:1 stoichiometric complex is shown in equation (6),

$$\frac{1}{F-F_0} = \frac{1}{F-F_s} + \frac{1}{(K_b(F-F_0)[Hg^{2+}])} \quad \dots(6)$$

Where,  $F_0$  is fluorescence intensity of probe in the absence of  $Hg^{2+}$  ion.  $F$  is fluorescence intensity of **L** in the presence of  $Hg^{2+}$  ion.  $F_s$  is fluorescence intensity of **L** at the saturation level. The ratio between the intercept and slope in linear regressive plot equals to binding constant ( $k_b$ )



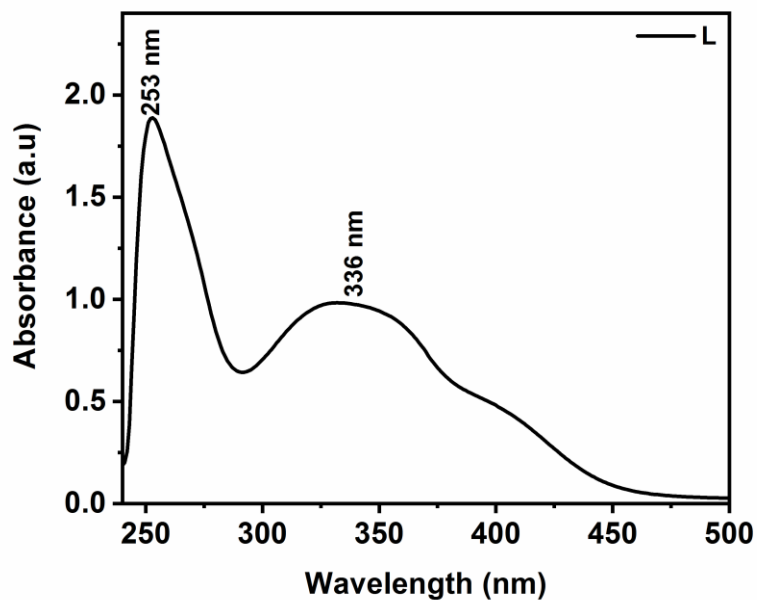

**Fig. S1.** UV-Vis spectrum of probe, **L** (50  $\mu$ M) in HEPES buffered (pH = 8.0) (DMSO:water (1:1, v/v)).

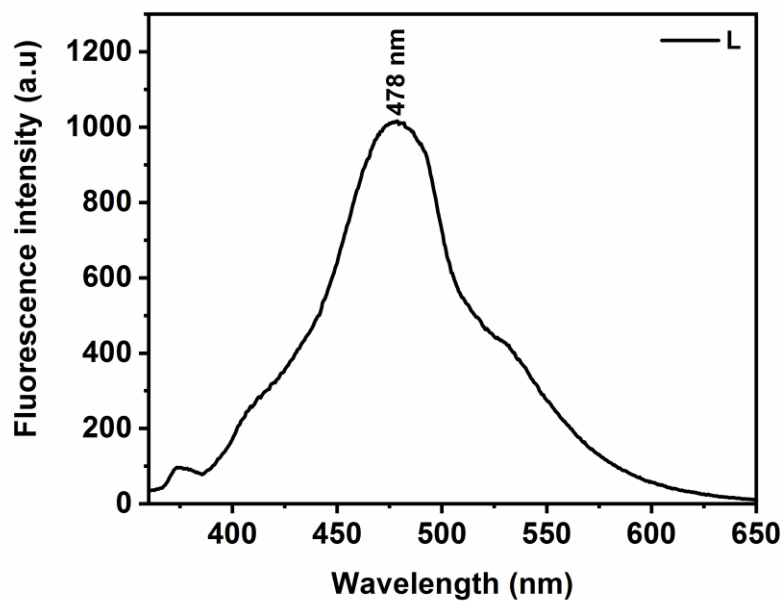

**Fig. S2.** Emission spectrum of probe, **L** (50  $\mu$ M) in HEPES buffered (pH = 8.0) (DMSO:water (1:1, v/v));  $\lambda_{\text{ex}} = 336$  nm.

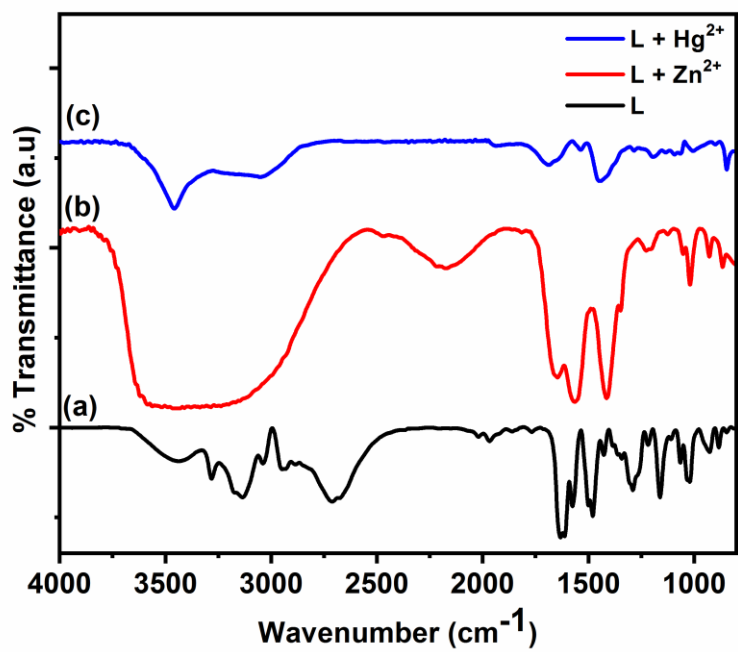

Fig. S3. FT-IR spectra of (a) L (b) L + Zn<sup>2+</sup> and (c) L + Hg<sup>2+</sup>.

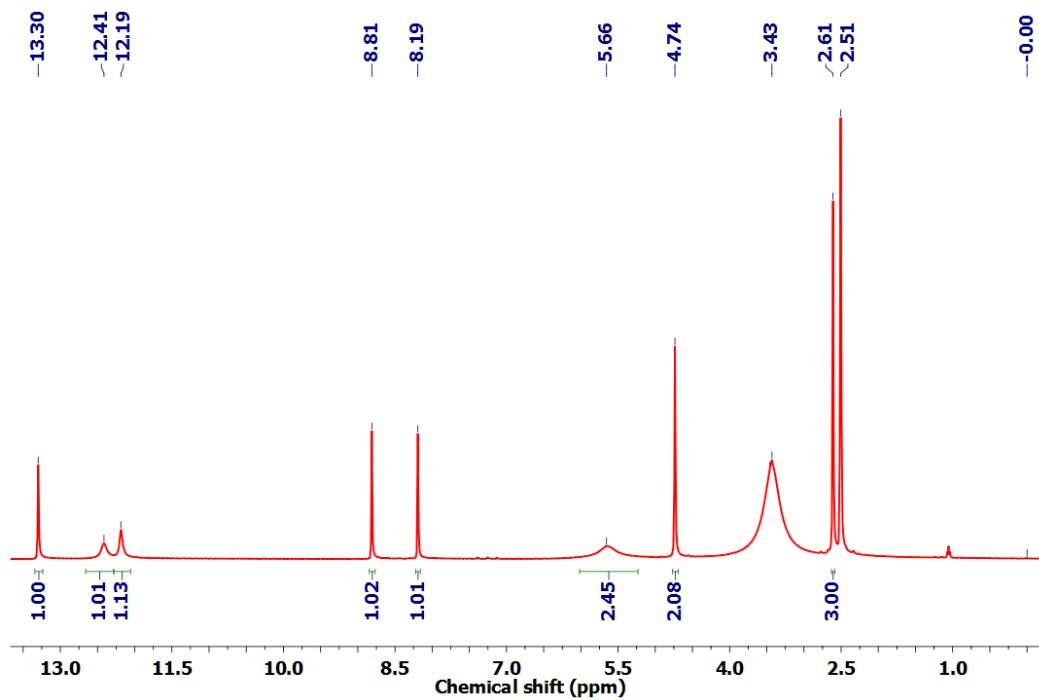

Fig. S4. <sup>1</sup>H NMR spectrum of probe, L (DMSO-d<sub>6</sub>, 400 MHz).

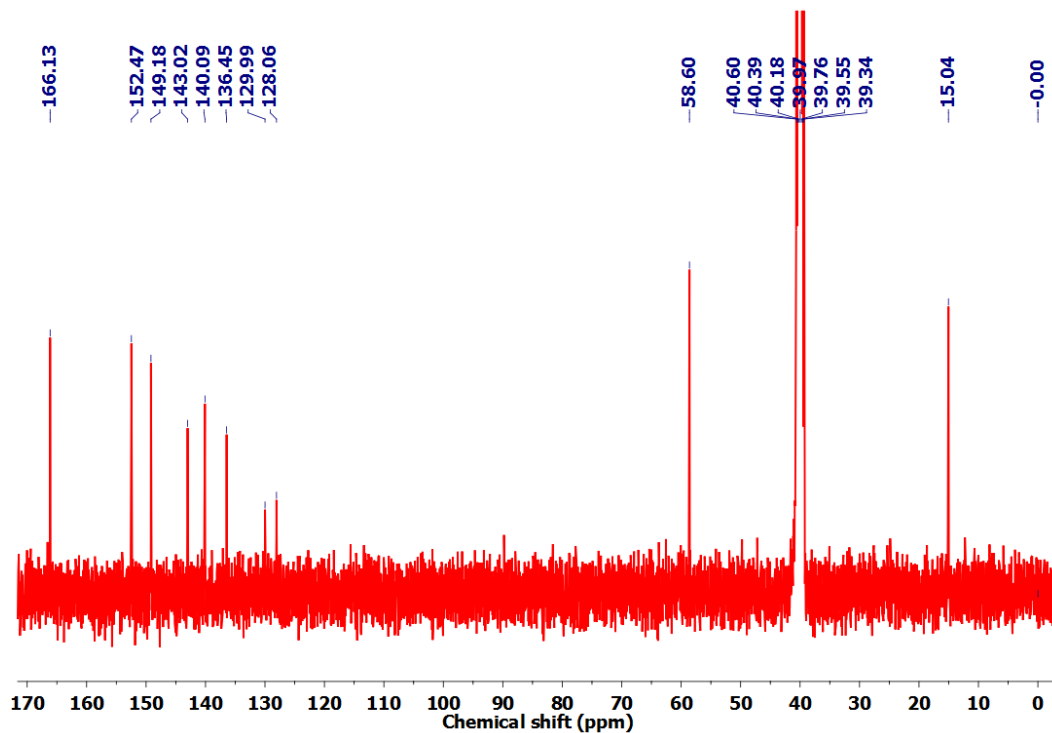

Fig. S5  $^{13}\text{C}$  NMR spectrum of probe, L (DMSO- $d_6$ , 100 MHz).

**Compound Details**

Cpd. 1: C<sub>10</sub> H<sub>13</sub> N<sub>7</sub> O<sub>2</sub> S

Compound Spectra (overlaid)

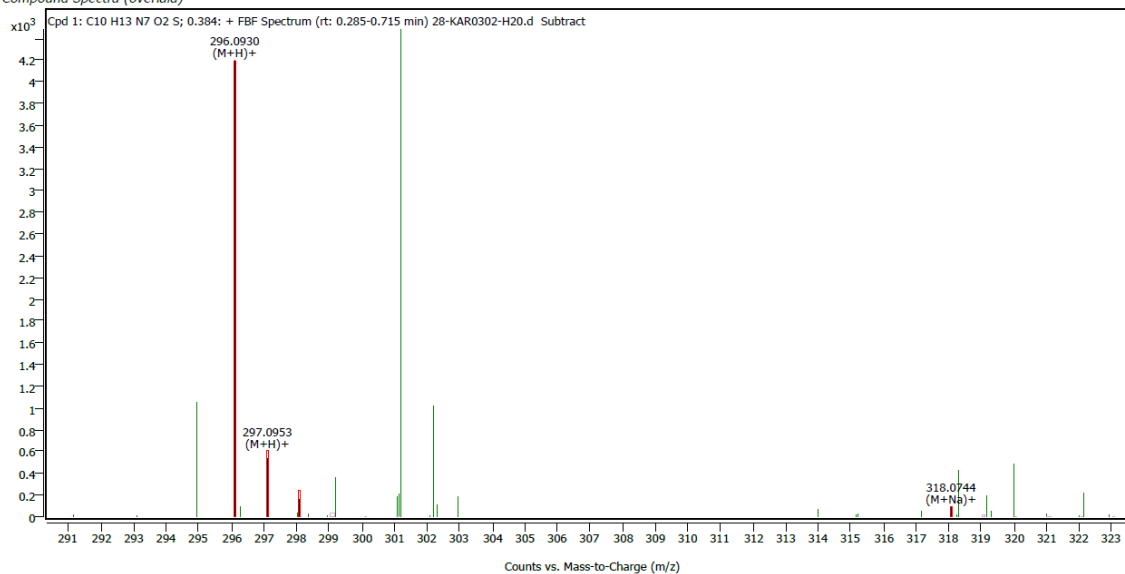

**Compound ID Table**

| Cpd | Formula                                                         | Mass (Tgt) | Calc. Mass | Mass                 | Species           | Diff(Tgt.ppm) | mDa  |
|-----|-----------------------------------------------------------------|------------|------------|----------------------|-------------------|---------------|------|
| 1   | C <sub>10</sub> H <sub>13</sub> N <sub>7</sub> O <sub>2</sub> S | 295.0851   | 295.0858   | 296.0930<br>318.0744 | (M+H)+<br>(M+Na)+ | 2.07          | 0.61 |

Fig. S6. Q-TOF HRMS spectrum of probe, L.

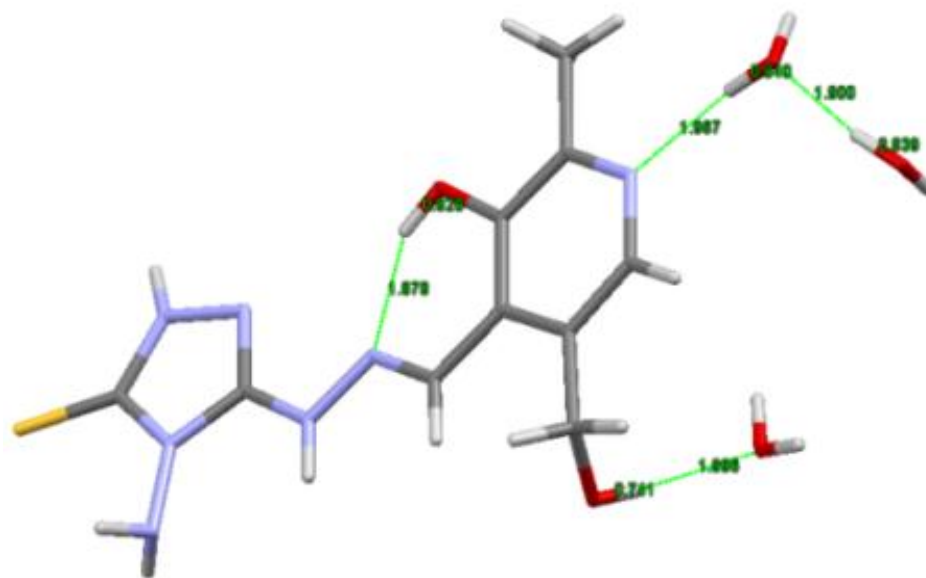

Fig. S7. Stick model of L showed the intra and intermolecular H-bond distance.

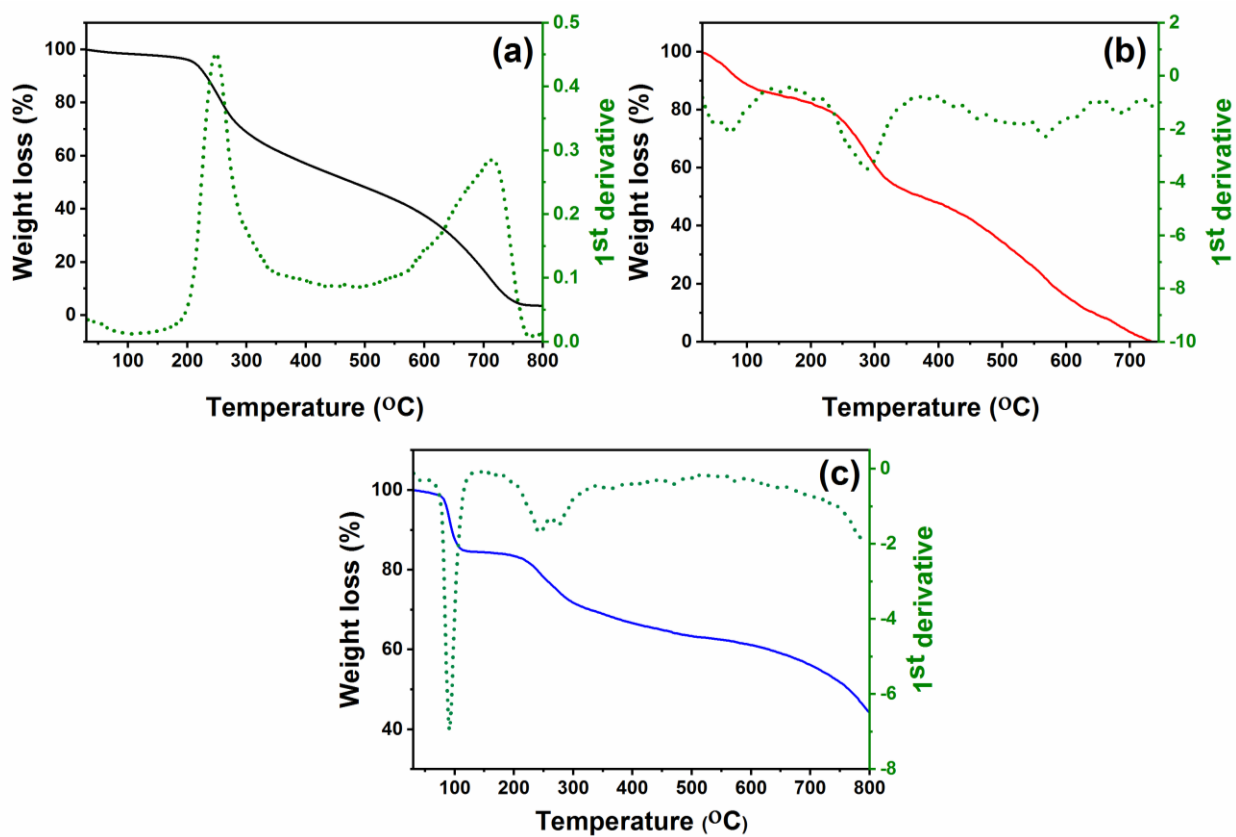

Fig. S8. TGA/DTA plots of (a) L (b) ZnL<sub>2</sub> and (c) Hg<sub>2</sub>L<sub>2</sub>.

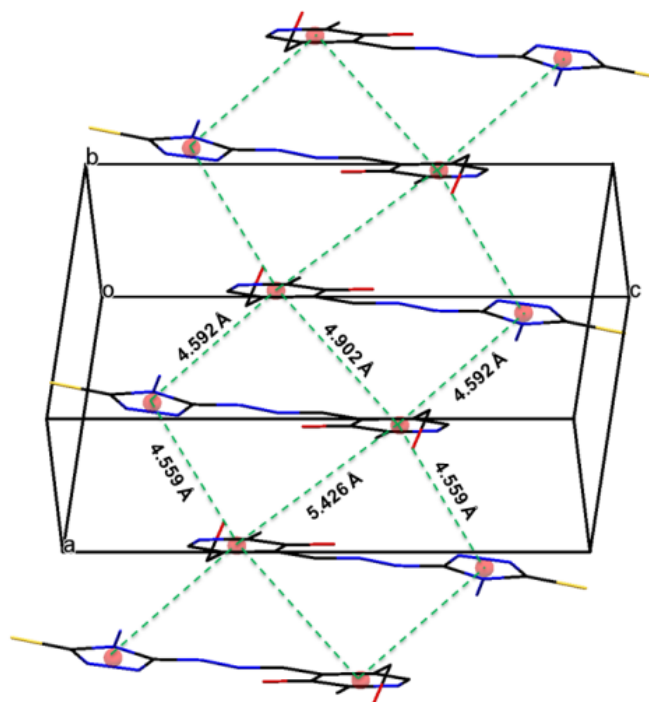

**Fig. S9.** Crystal packing view of **L** showing the existence of aromatic  $\pi$ - $\pi$  interactions in the crystal (lattice water molecules and hydrogens are omitted for clarity).

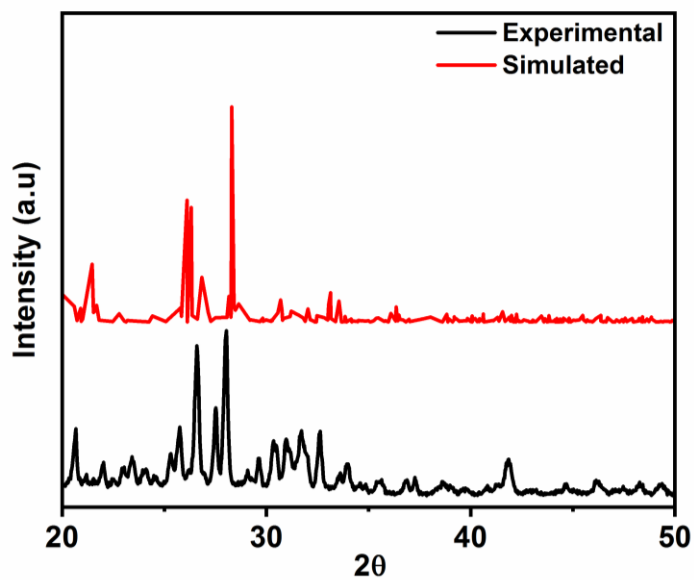

**Fig. S10.** Comparison of powder XRD pattern of experimental with simulated pattern (generated from CIF file using Mercury 3.0 software package).

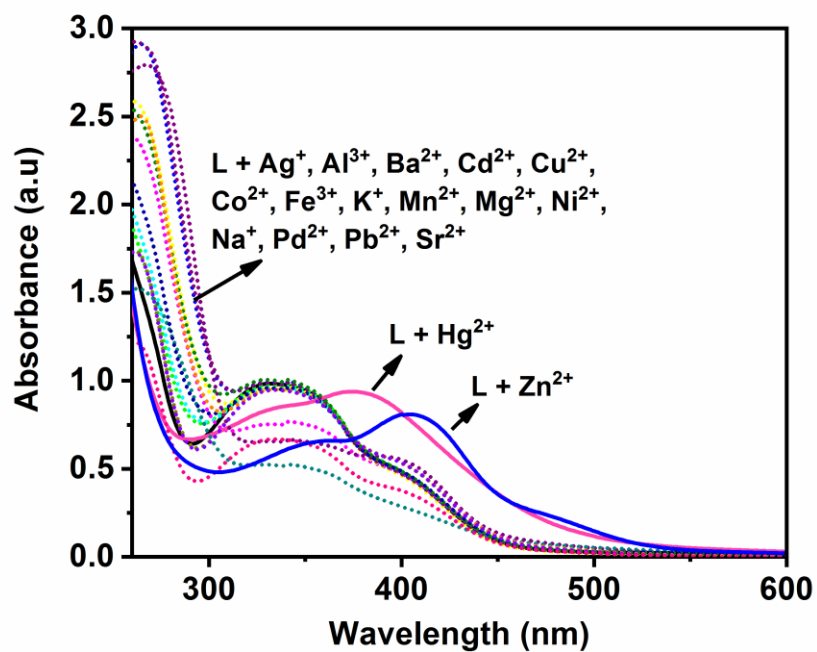

**Fig. S11.** Selective absorbance response of **L** (50  $\mu\text{M}$ ) in HEPES buffered (pH = 8.0) (DMSO:water (1:1, v/v)) towards competitive metal ions.

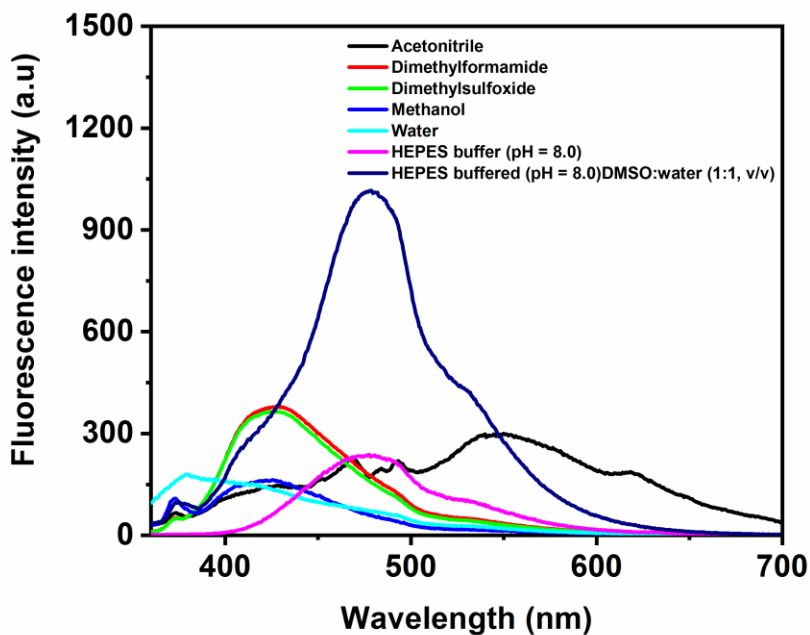

**Fig. S12.** Fluorescence spectra of **L** (50  $\mu\text{M}$ ) in various solvents;  $\lambda_{\text{ex}} = 336 \text{ nm}$ .

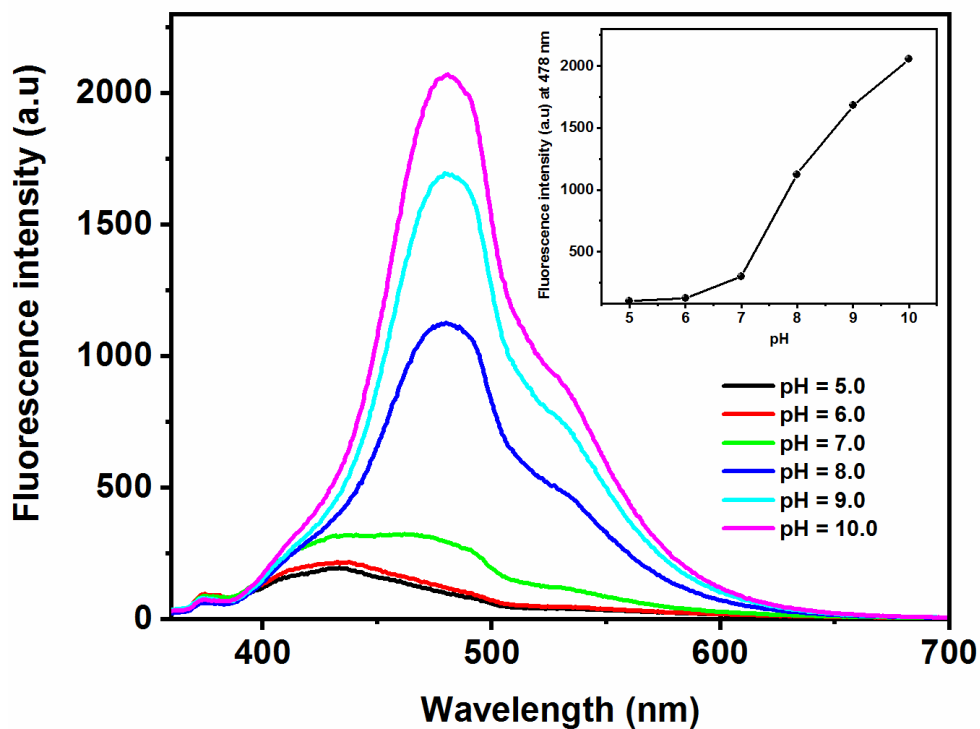

**Fig. S13.** Effect of pH on the fluorescence intensity of probe, **L** (50 μM).

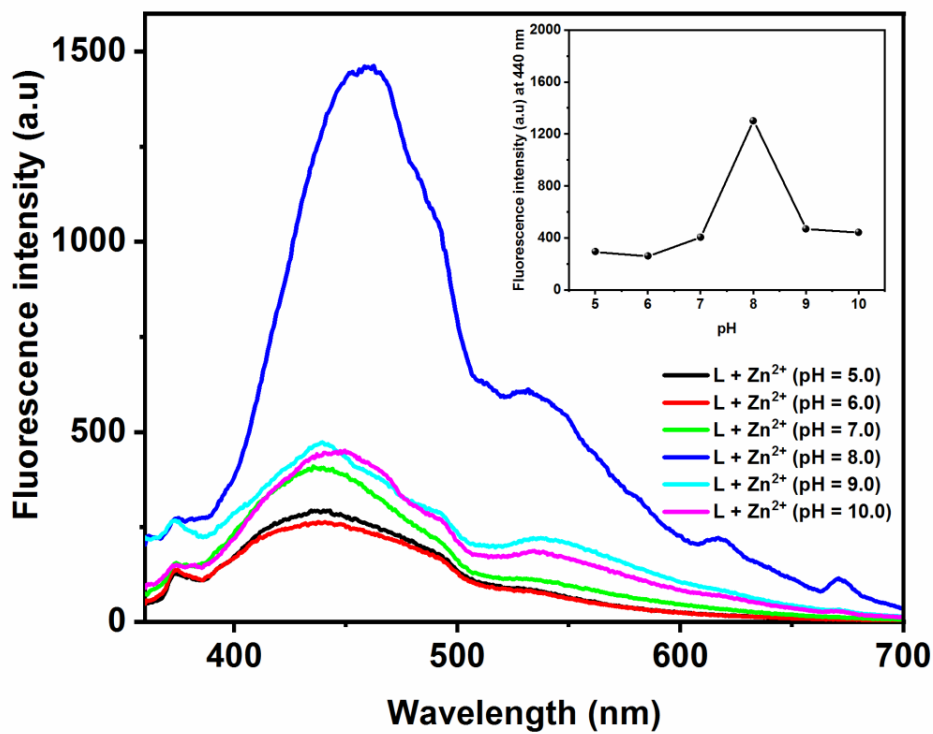

**Fig. S14.** Effect of pH on the fluorescence intensity of probe, **L** (50 μM) in the absence and presence of Zn<sup>2+</sup> (25 μM).

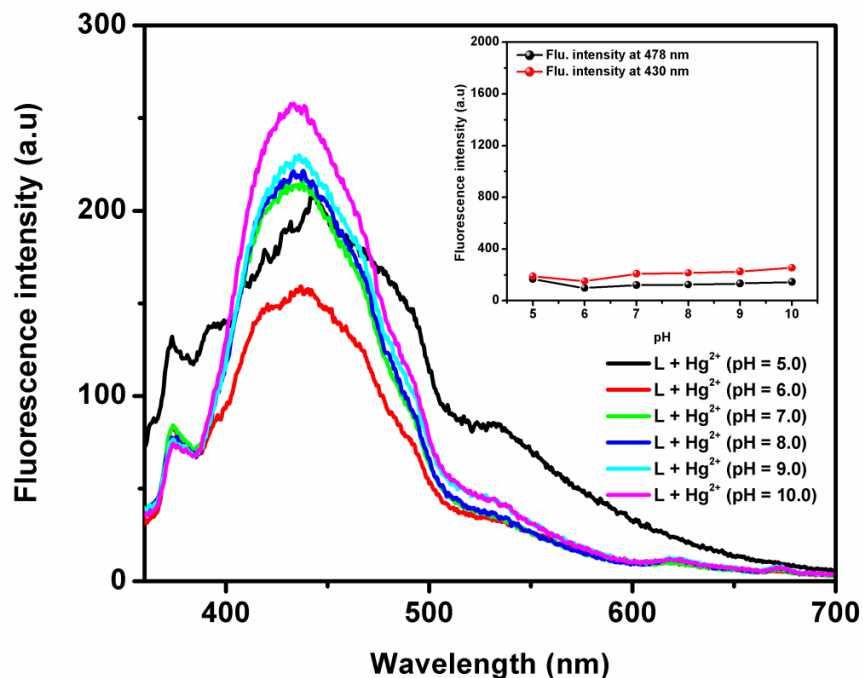

**Fig. S15.** Effect of pH on the fluorescence intensity of probe, L (50 μM) in the absence and presence of Hg<sup>2+</sup> (50 μM).

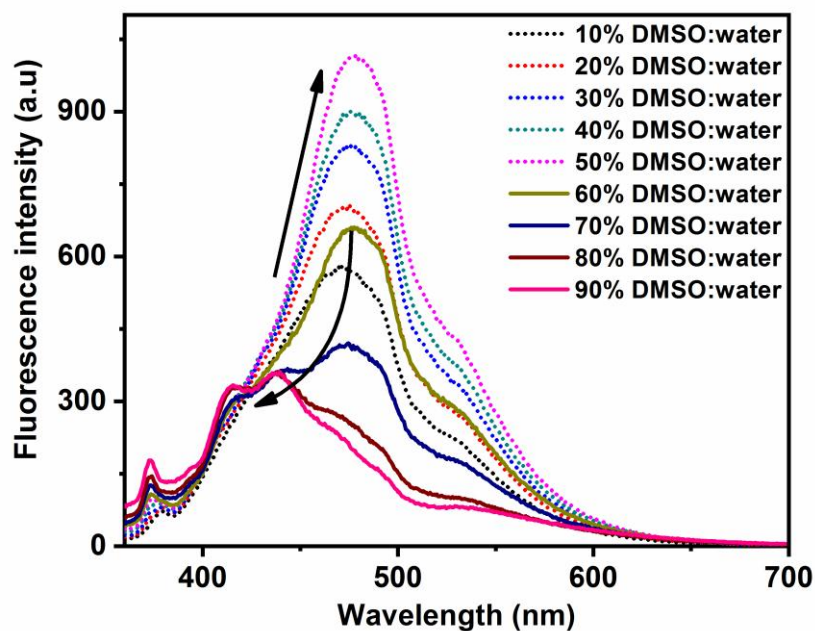

**Fig. S16.** Fluorescence spectra of L (50 μM) in various ratios (v/v) of DMSO and water in HEPES buffered medium (pH = 8.0).



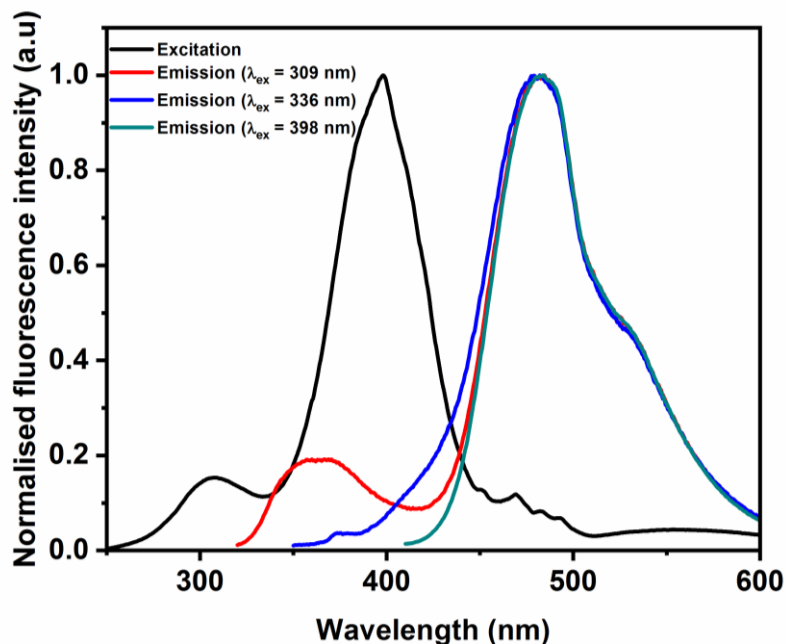

**Fig. S17.** Normalised excitation and emission spectra of probe, **L** ( $\lambda_{\text{ex}} = 309, 336$  and  $398$  nm).

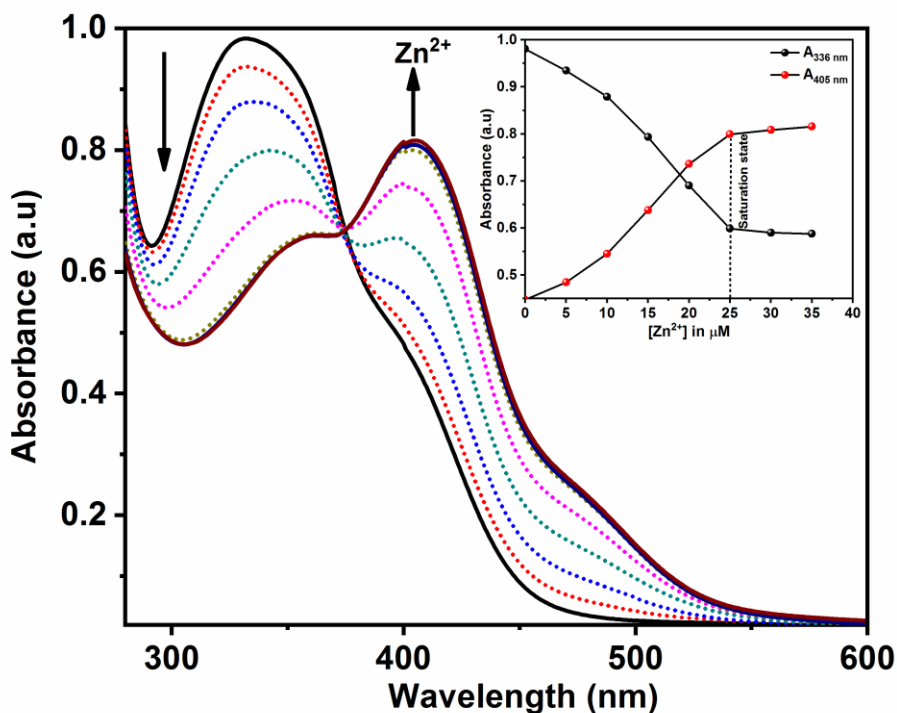

**Fig. S18.** UV-Vis titration of **L** ( $50 \mu\text{M}$ ) in HEPES buffered ( $\text{pH} = 8.0$ ) (DMSO:water (1:1, v/v)) medium upon addition of  $\text{Zn}^{2+}$ ; gradually increasing  $[\text{Zn}^{2+}]$  from 0 to  $25 \mu\text{M}$ , excess addition till  $35 \mu\text{M}$ . Inset: The plot of absorbance intensity at 405 and 336 nm versus concentration of  $\text{Zn}^{2+}$ .

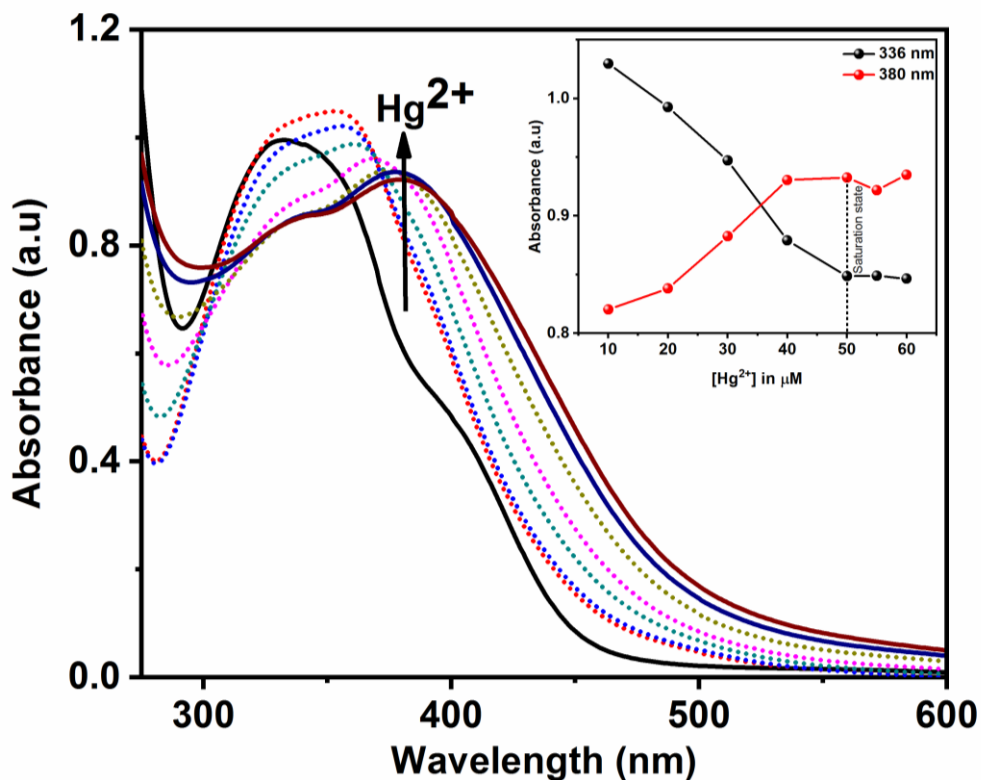

**Fig. S19.** UV-Vis titration of L (50 μM) in HEPES buffered (pH = 8.0) (DMSO:water (1:1, v/v)) medium upon addition of Hg<sup>2+</sup>; gradually increasing [Hg<sup>2+</sup>] from 0 to 50 μM, and excess addition till 60 μM. Inset: The plot of absorbance intensity at 388 and 336 nm versus concentration of Hg<sup>2+</sup>.

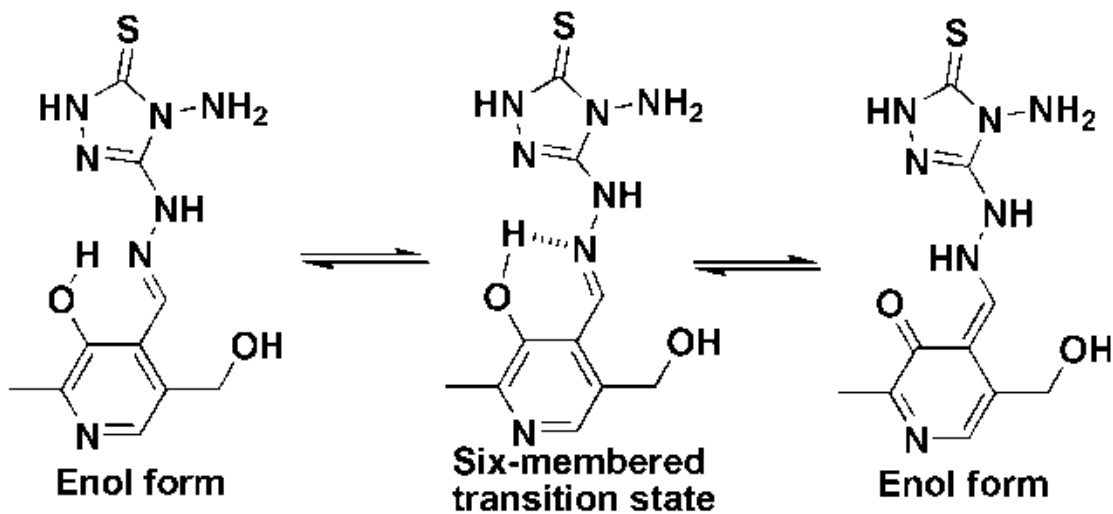

**Fig. S20.** Illustration of keto-enol tautomerism *via* six-membered transition state.

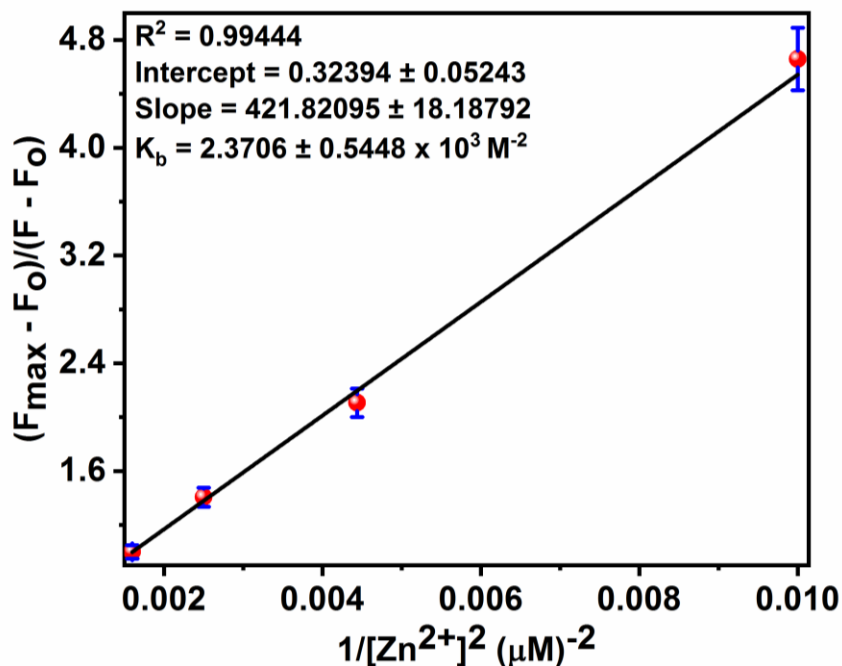

**Fig. S21.** Benesi-Hildebrand (B-H) plot of fluorescence changes at 440 nm upon addition of  $\text{Zn}^{2+}$  ion (linearity plotted using the addition from 10  $\mu\text{M}$  to 25  $\mu\text{M}$  of  $\text{Zn}^{2+}$  to **L**).

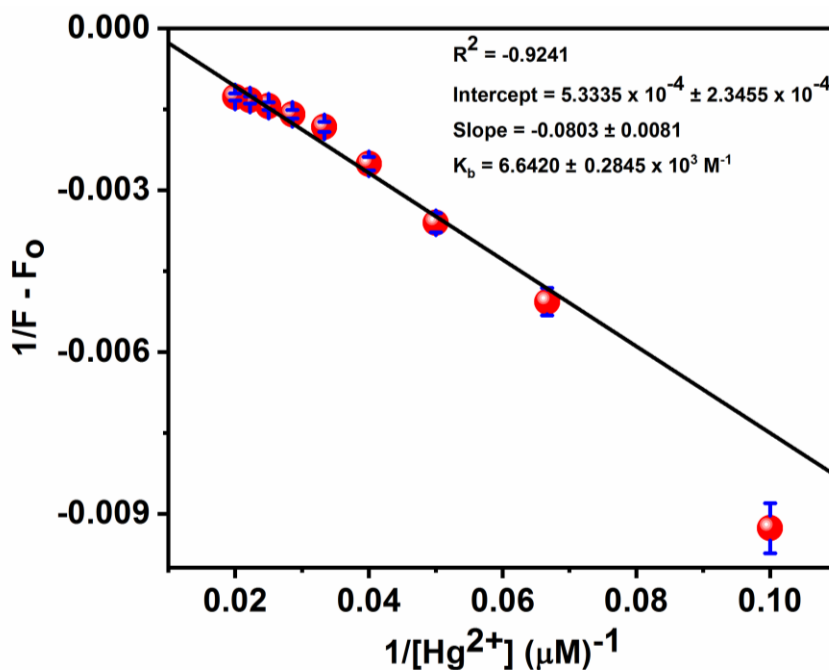

**Fig. S22.** Benesi-Hildebrand (B-H) plot of fluorescence changes at 478 nm upon addition of  $\text{Hg}^{2+}$  ion (linearity plotted using the addition from 10  $\mu\text{M}$  to 50  $\mu\text{M}$  of  $\text{Hg}^{2+}$  to **L**).

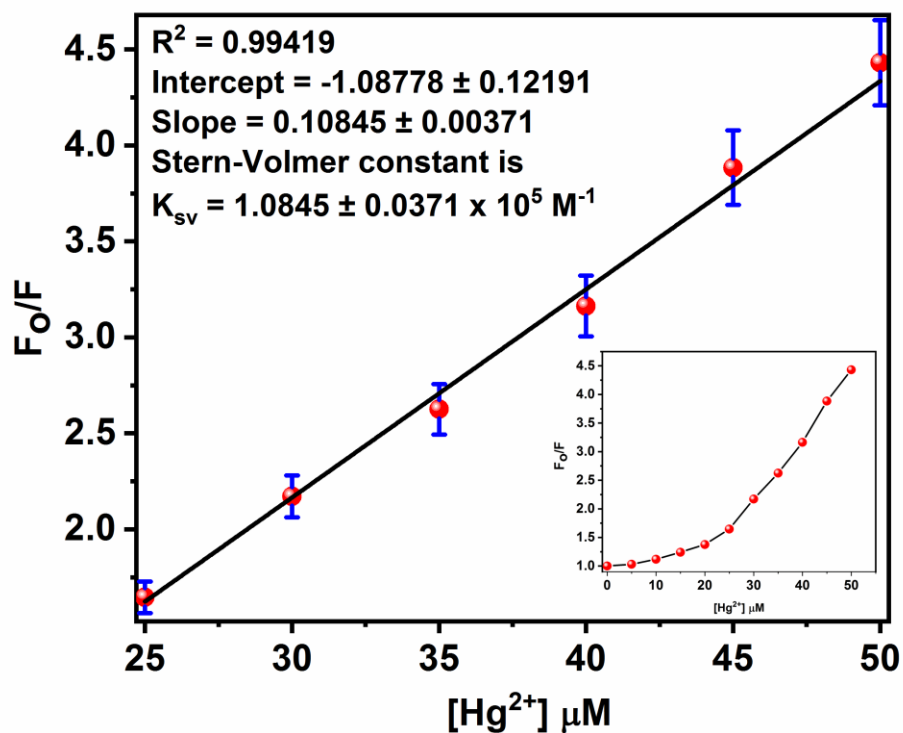

**Fig. S23.** Stern-Volmer plot of fluorescence changes at 478 nm upon addition of  $\text{Hg}^{2+}$  ion (linearity plotted using the addition from 25  $\mu\text{M}$  to 50  $\mu\text{M}$  of  $\text{Hg}^{2+}$  to L).

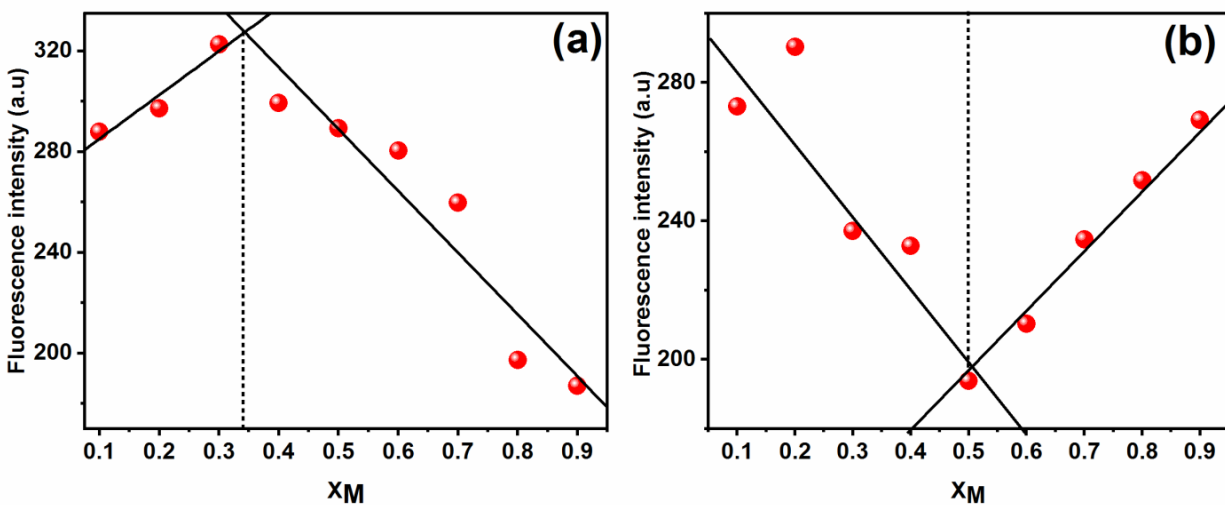

**Fig. S24.** Job's plot for (a)  $\text{ZnL}_2$  and (b)  $\text{Hg}_2\text{L}_2$  formation using emission spectral data of ( $\lambda_{ex} = 336 \text{ nm}$ ).

## Calculation of Limit of Detection (LOD)

The limit of detection (LOD) was estimated based on emission titration data. The detection limit was calculated using equation (7),

$$\text{LOD} = \frac{3\sigma}{k} \quad \dots(7)$$

Where,  $\sigma$  is the standard deviation of blank measurement<sup>[7]</sup> and  $k$  is the slope between fluorescence intensity versus respective metal ion concentration.

Limit of detection is determined using fluorescence method. Standard deviation is calculated from of free ligand (without zinc) measured its fluorescence intensity with five times and shows standard deviation of 5.7060.

The slope of  $32.76126 \pm 11.2278$  is obtained from linear regressive plot of increasing zinc ion concentration of fixed probe concentration (50  $\mu\text{M}$ ). From which, we calculated using standard formula  $\text{LOD} = 3 \times 5.7060 / 32.76126 \pm 11.2278 = 5.225 \pm 0.1530 \times 10^{-7}$  M. Similarly, using the slope value obtained from linear regressive plot of increasing mercury ion concentration of fixed probe concentration and calculated LOD is  $10.592 \pm 0.734 \times 10^{-7}$  M.

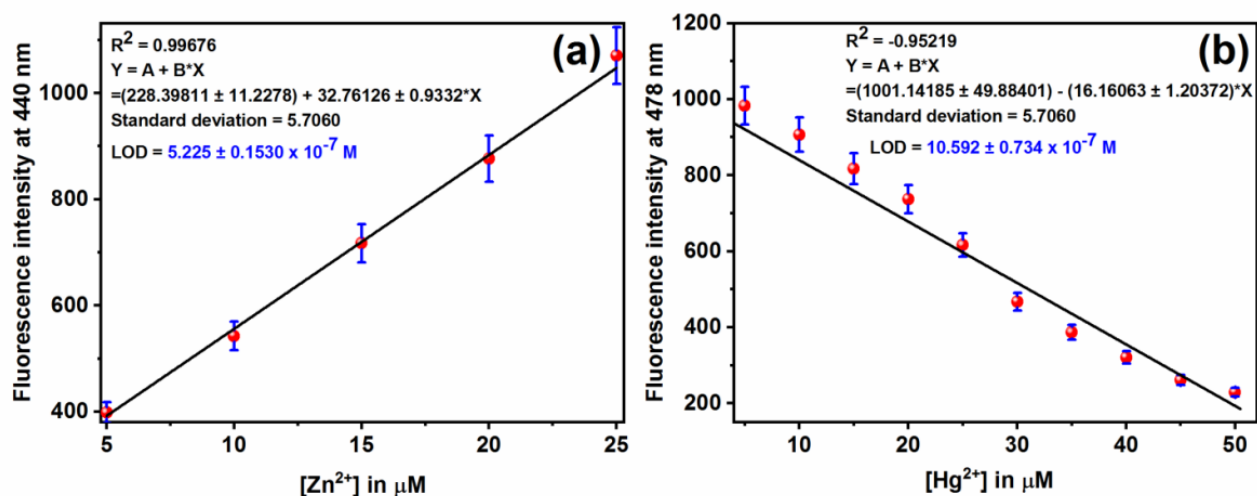

**Fig. S25.** Determination of LOD (a) Linear regressive plot of **L** with Zn<sup>2+</sup> ion concentration from 5 to 25  $\mu\text{M}$  (b) Linear regressive plot of **L** with Hg<sup>2+</sup> ion concentration from 5 to 50  $\mu\text{M}$ .

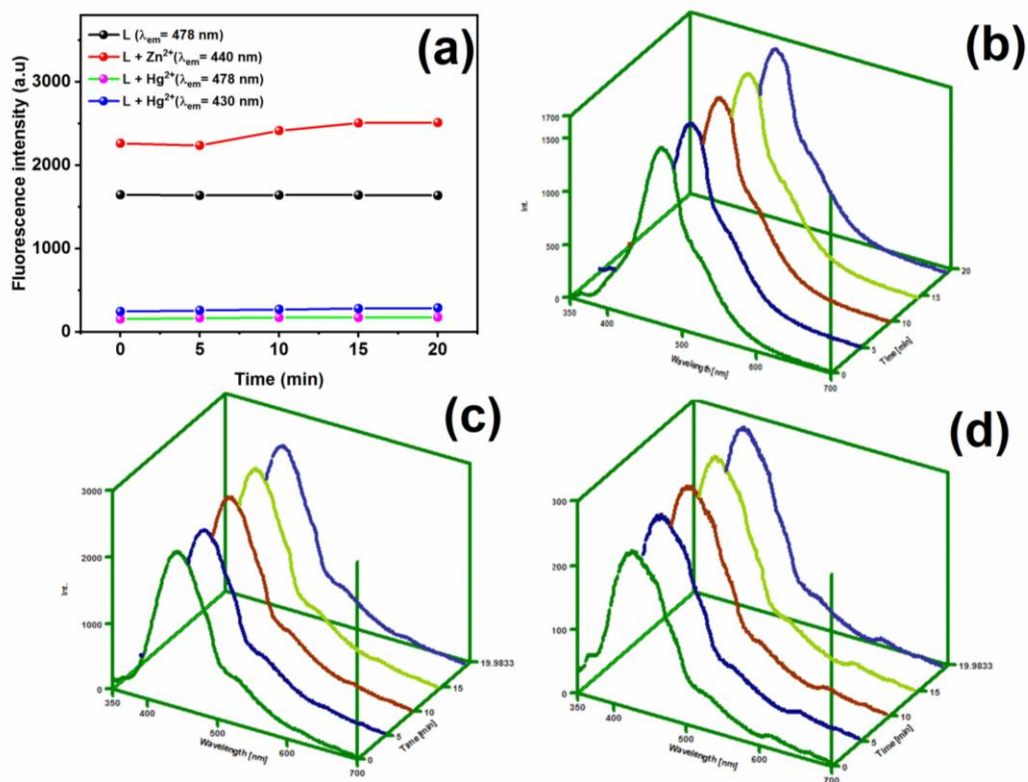

**Fig. S26.** (a) Time course measurement study of **L** (60  $\mu$ M) in the presence and absence of  $Zn^{2+}$  and  $Hg^{2+}$  (60  $\mu$ M); The full spectrum viewed and labeled as (b), (c) and (d) are 3D plot of interval scan measurements of **L**, **L** +  $Zn^{2+}$  and **L** +  $Hg^{2+}$  in HEPES buffered (pH = 8.0) (DMSO:water (1:1, v/v)) medium.

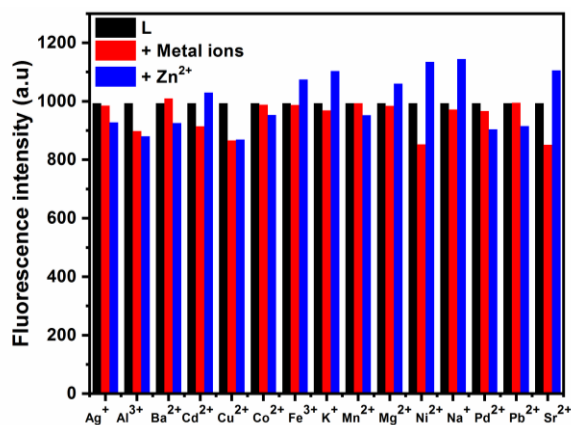

**Fig. S27.** Fluorescence Interference study of **L** in the presence of competitive metal ions (1 equiv.) with and without  $Zn^{2+}$  ion (1.0 equiv.) HEPES buffered (pH = 8.0) (DMSO:water (1:1, v/v)).

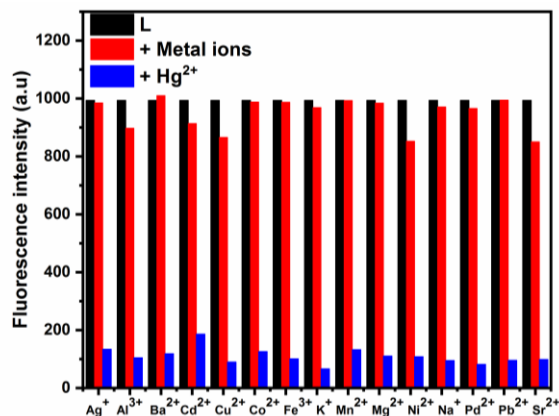

**Fig. S28.** Fluorescence Interference study of **L** in the presence of competitive metal ions (1 equiv.) with and without  $\text{Hg}^{2+}$  ion (1 equiv.) HEPES buffered (pH = 8.0) (DMSO:water (1:1, v/v)).

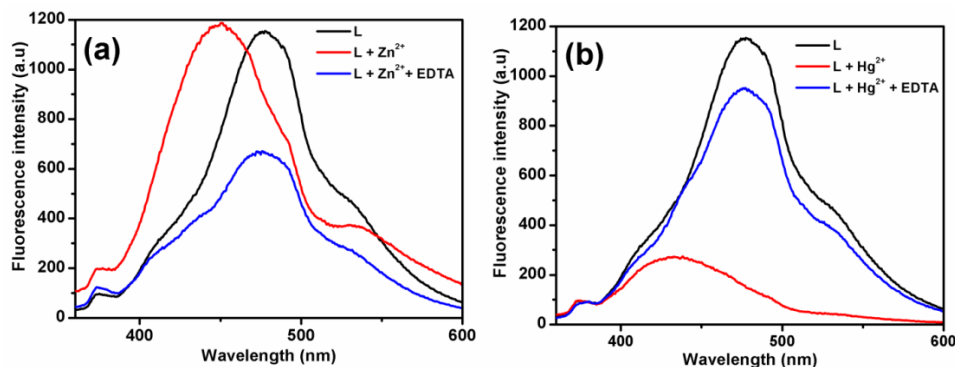

**Fig. S29.** Fluorescence spectra recorded in HEPES buffered (pH = 8.0) DMSO:water (1:1, v/v) medium; (a) Reversibility of **L** +  $\text{Zn}^{2+}$  with EDTA (b) Reversibility of **L** +  $\text{Hg}^{2+}$  with EDTA.

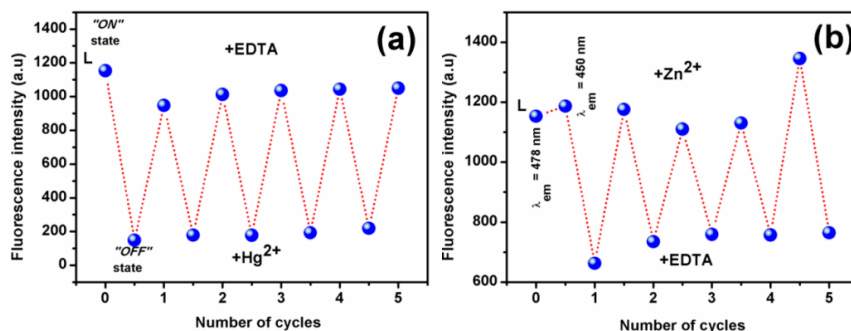

**Fig. S30.** Recovery cycles of (a) **L** (50  $\mu\text{M}$ ) upon alternative addition of  $\text{Zn}^{2+}$  (1 equiv.) and EDTA (1 equiv.); (b) **L** (50  $\mu\text{M}$ ) upon alternative addition of  $\text{Zn}^{2+}$  (1 equiv.) and EDTA (1 equiv.)

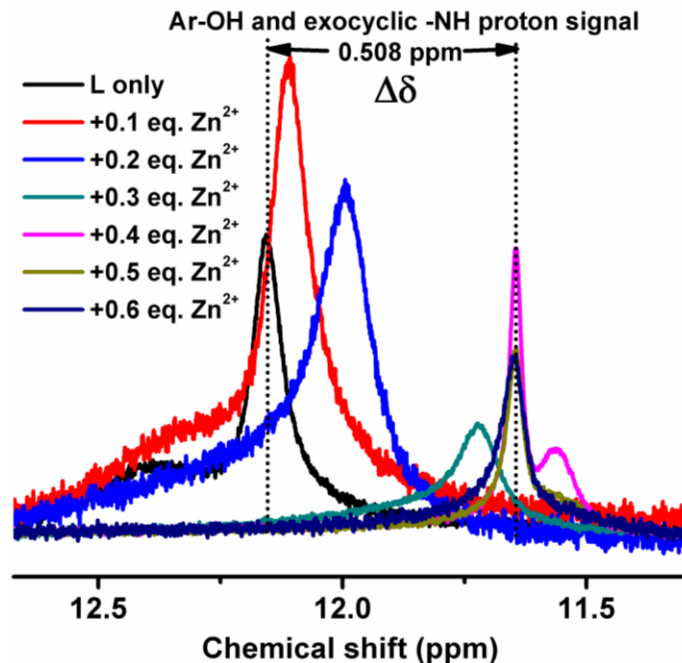

**Fig. S31.** Partial <sup>1</sup>H NMR spectral titration of probe with successive addition of Zn(OAc)<sub>2</sub> in DMSO-*d*<sub>6</sub> for zoomed view of aromatic -OH and exocyclic -NH signal changes.

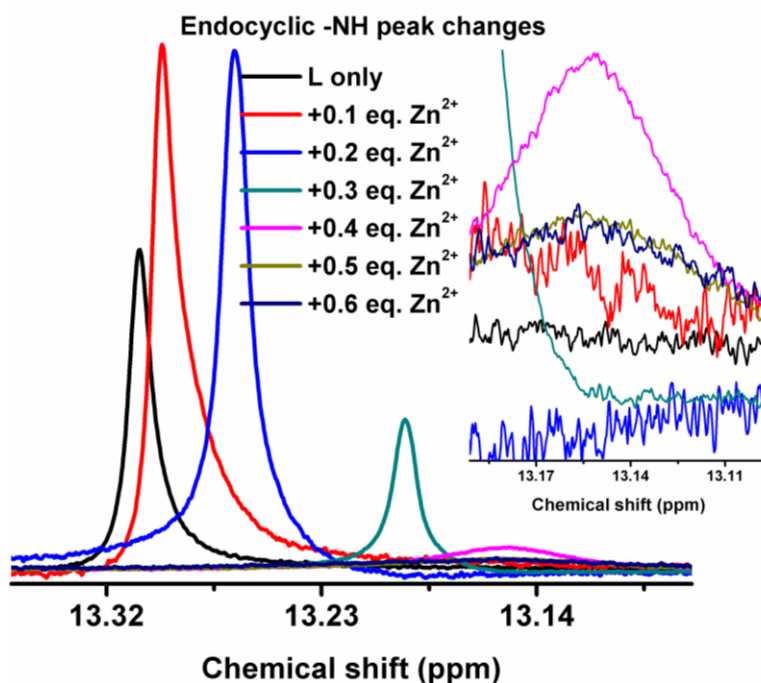

**Fig. S32.** Partial <sup>1</sup>H NMR spectral titration of probe with successive addition of Zn(OAc)<sub>2</sub> in DMSO-*d*<sub>6</sub> for zoomed view of endocyclic -NH signal changes.



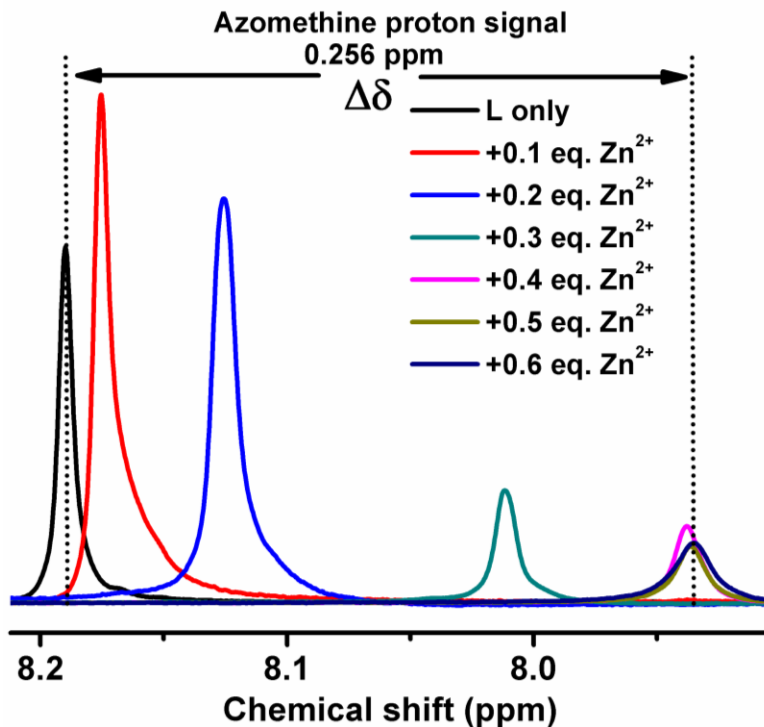

**Fig. S33.** Partial <sup>1</sup>H NMR spectral titration of probe with successive addition of Zn(OAc)<sub>2</sub> in DMSO-*d*<sub>6</sub> for zoomed view of azomethine signal changes.

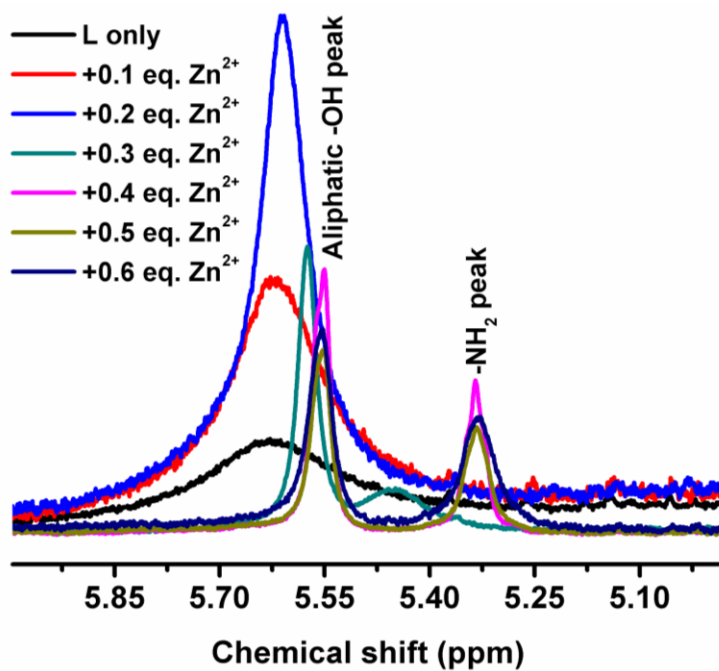

**Fig. S34.** Partial <sup>1</sup>H NMR spectral titration of probe with successive addition of Zn(OAc)<sub>2</sub> in DMSO-*d*<sub>6</sub> for zoomed view of aliphatic -OH and -NH<sub>2</sub> signal changes.

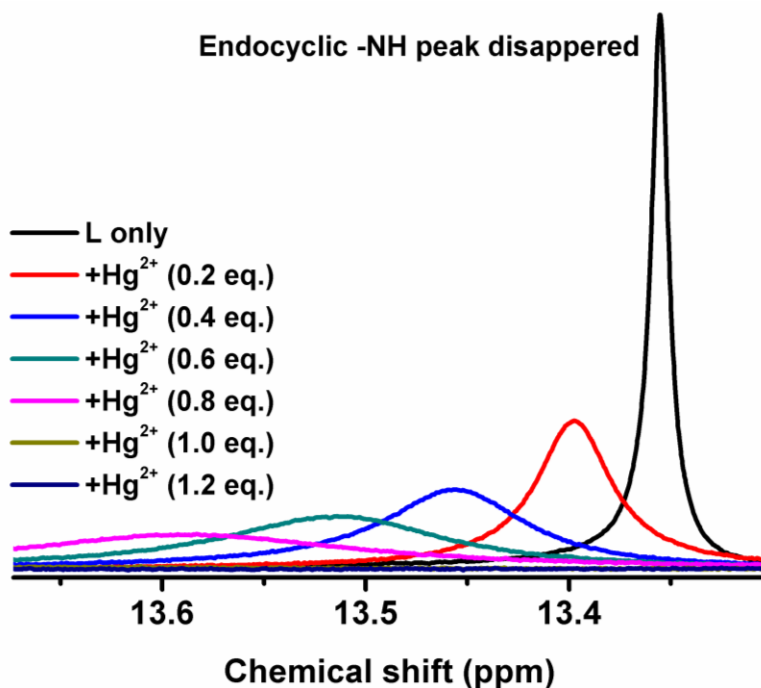

**Fig. S35.** Partial <sup>1</sup>H NMR spectral titration of probe with successive addition of HgCl<sub>2</sub> in DMSO-*d*<sub>6</sub> for zoomed view of endocyclic -NH signal changes.

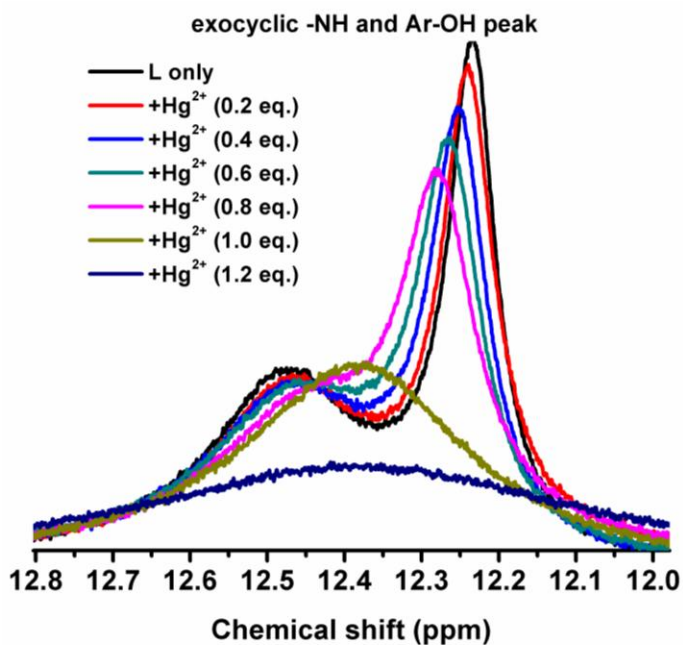

**Fig. S36.** Partial <sup>1</sup>H NMR spectral titration of probe with successive addition of HgCl<sub>2</sub> in DMSO-*d*<sub>6</sub> for zoomed view of exocyclic -NH and Ar-OH signal changes.

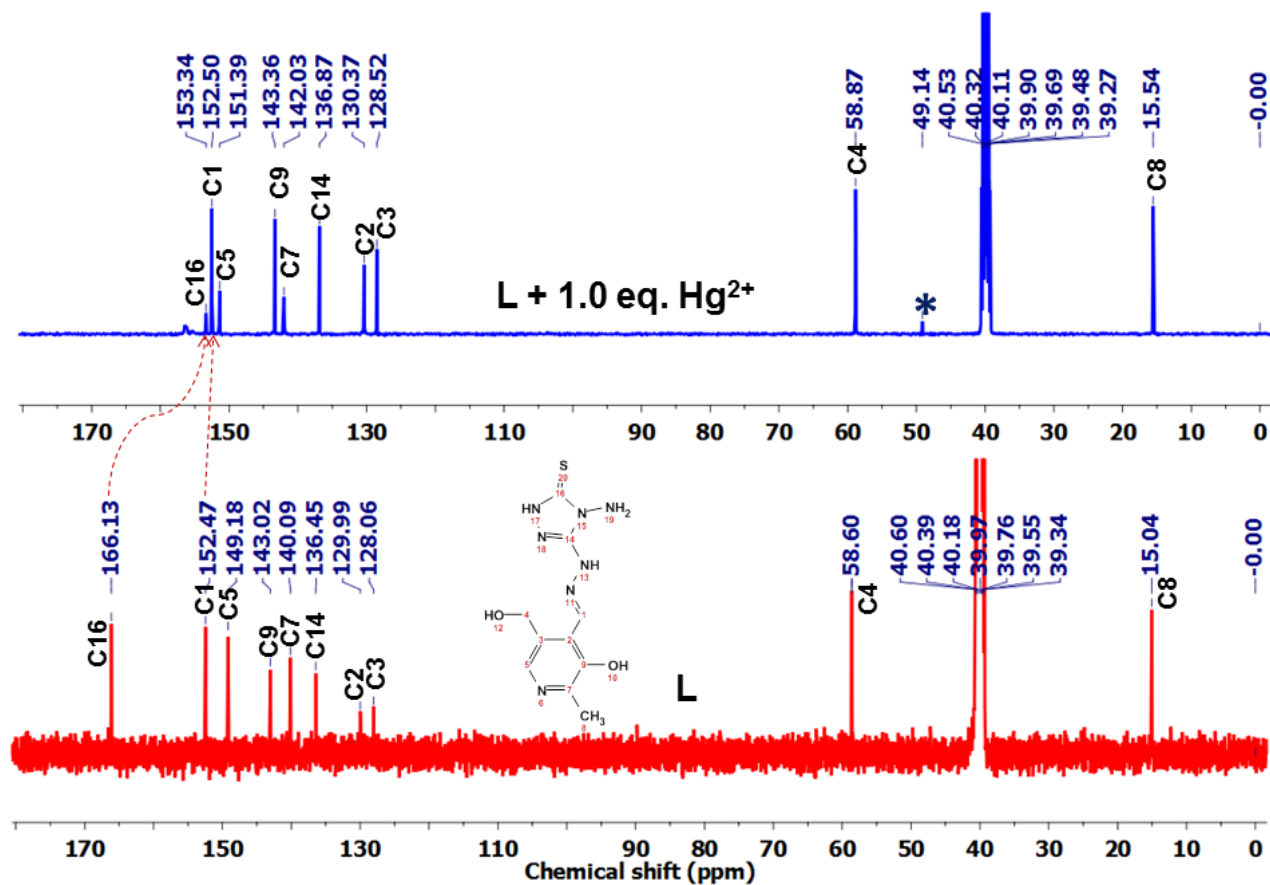

**Fig. S37.** <sup>13</sup>C NMR spectra of probe (L) with 1.0 equivalent addition of HgCl<sub>2</sub> in DMSO-*d*<sub>6</sub> (100 MHz) Note; the asterisk symbol \* indicated that trace amount of methanol solvent.

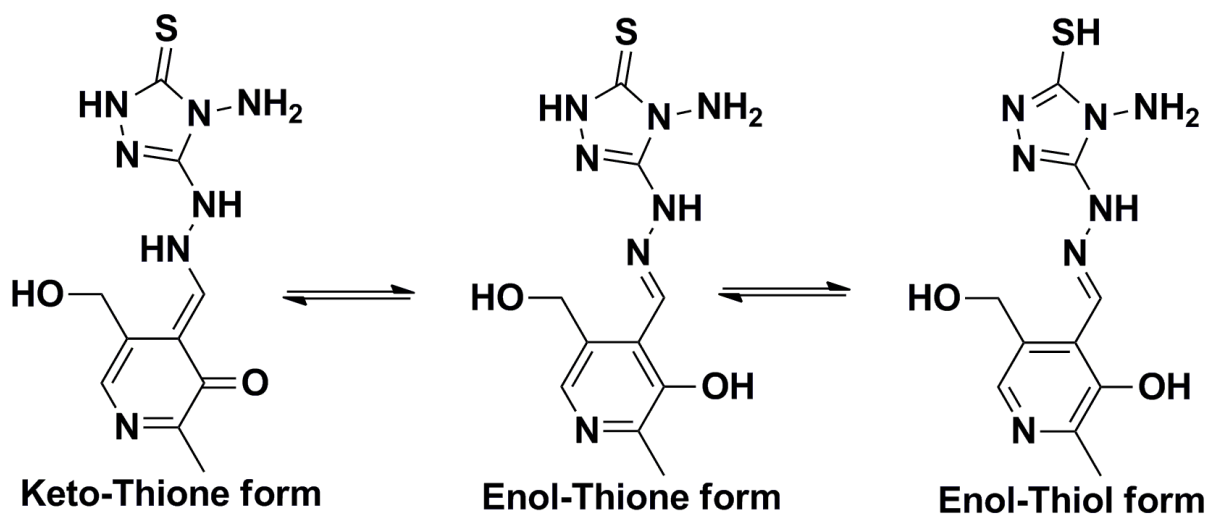

**Fig. S38.** Possible tautomeric forms of probe (L).

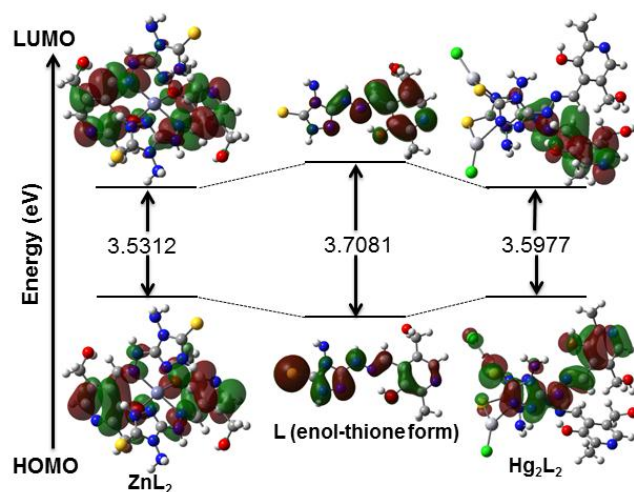

**Fig. S39.** Frontier molecular orbital diagram of **L**, **ZnL<sub>2</sub>** and **Hg<sub>2</sub>L<sub>2</sub>** in gas phase level.

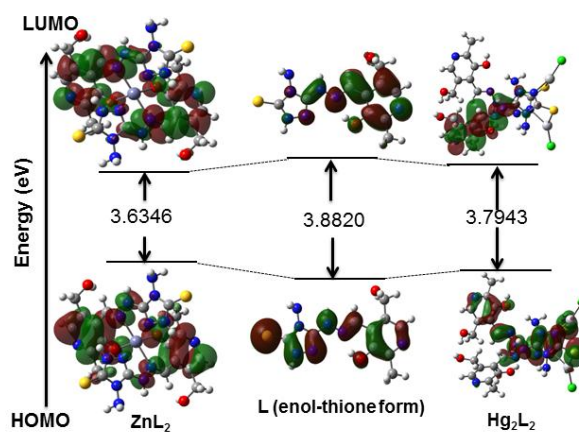

**Fig. S40.** Frontier molecular orbital diagram of **L**, **ZnL<sub>2</sub>** and **Hg<sub>2</sub>L<sub>2</sub>** in water medium.

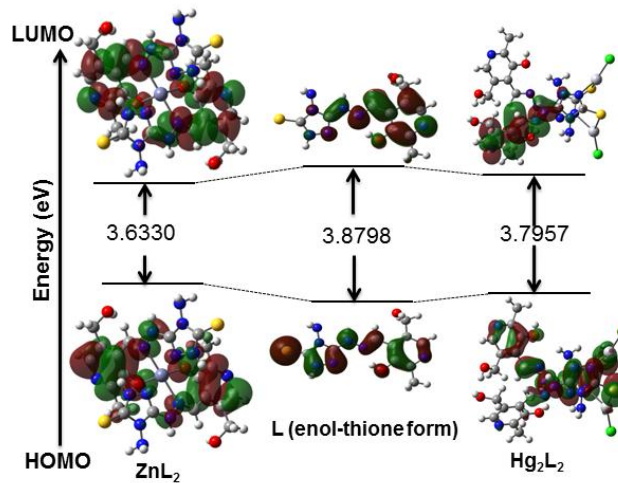

**Fig. S41.** Frontier molecular orbital diagram of **L**, **ZnL<sub>2</sub>** and **Hg<sub>2</sub>L<sub>2</sub>** in DMSO medium.

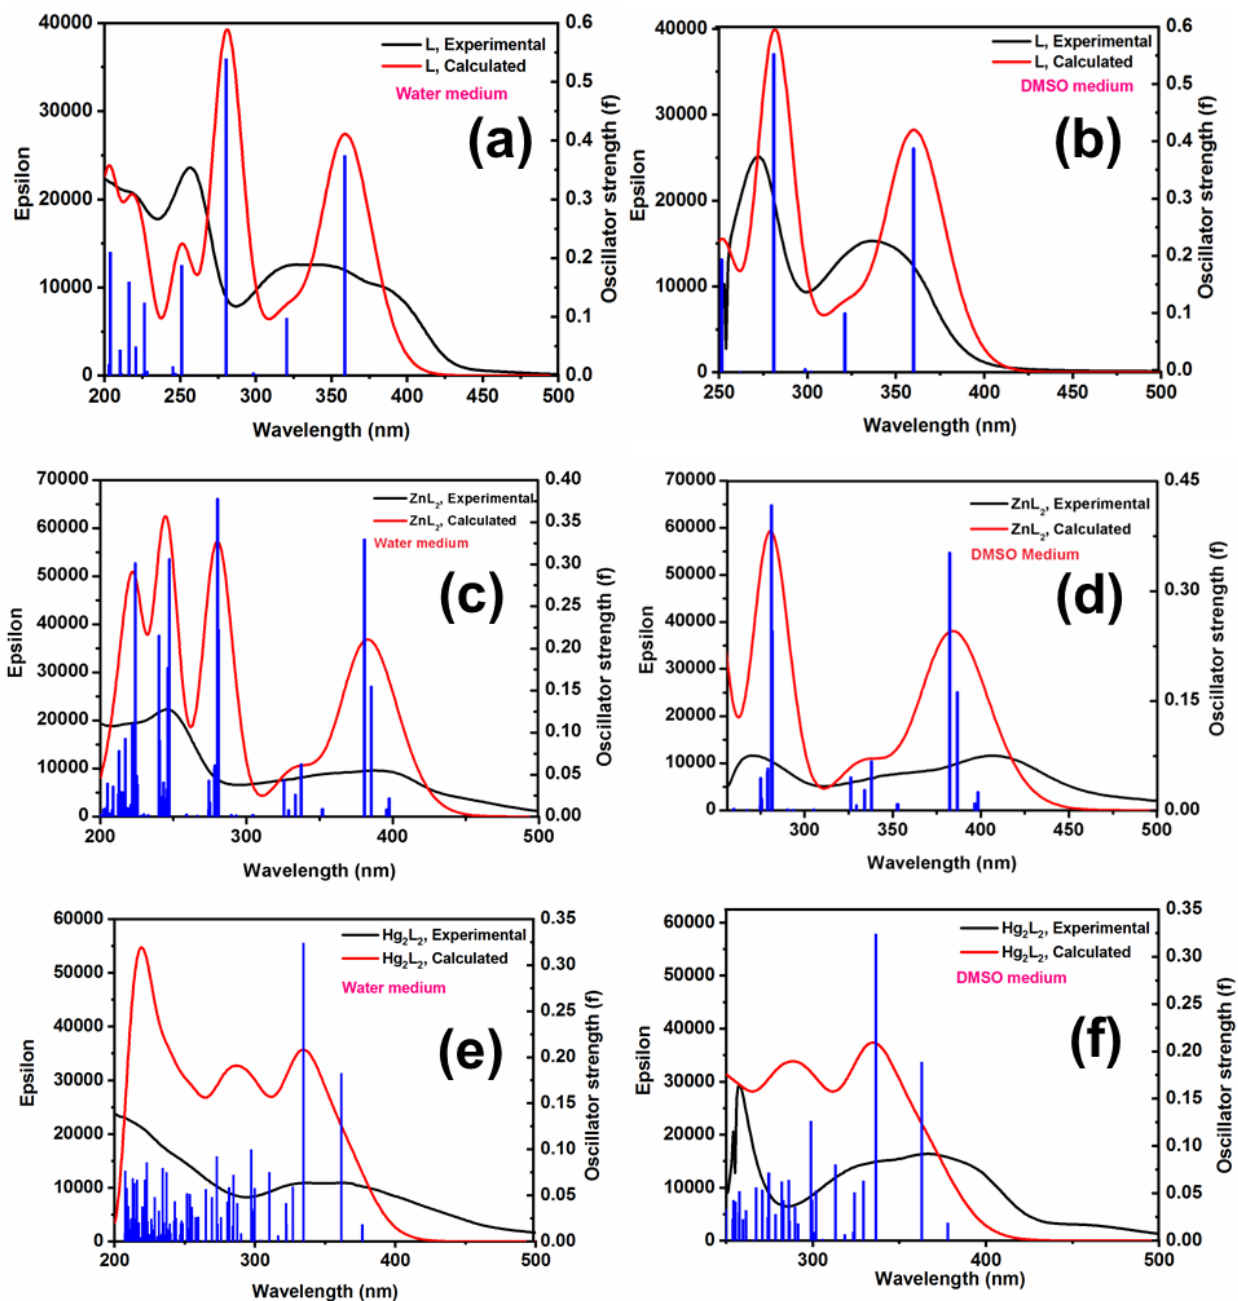

**Fig. S42.** Calculated UV-Vis spectra (red colour) with oscillator strengths (blue colour) of (a) **L** in water (b) **L** in DMSO (c) **ZnL<sub>2</sub>** in water (d) **ZnL<sub>2</sub>** in DMSO (e) **Hg<sub>2</sub>L<sub>2</sub>** in water and (f) **Hg<sub>2</sub>L<sub>2</sub>** in DMSO medium; The black colour represents the experimental UV-Vis results.

To determine the optical band gap of probe, and its complexes with Zn<sup>2+</sup> and Hg<sup>2+</sup>, the solid state UV-DRS spectra were analysed. The optical band gap was calculated from Tauc plot by

extrapolating the linear to x-axis, i.e.,  $[hvF(R)]^{1/2} = 0$  (Fig. S43). It has been noted that the optical band gap of probe (2.406 eV) was reduced to 2.0392 and 1.9595 eV, respectively, for the mixtures of **L** + **Zn(II)** and **L** + **Hg(II)**. The complex formation was confirmed by the decreased optical band gaps of probe with  $Zn^{2+}$  and  $Hg^{2+}$ . This experimentally observed band gaps for probe and its complexes were found to be lesser than the theoretical values. They were calculated using HOMO-LUMO energy gap of optimized geometries in gas phase (Fig. S39). The deviation in band gap may be due to the comparison of solid-state measurement with the gas phase optimized geometries.<sup>[8]</sup>

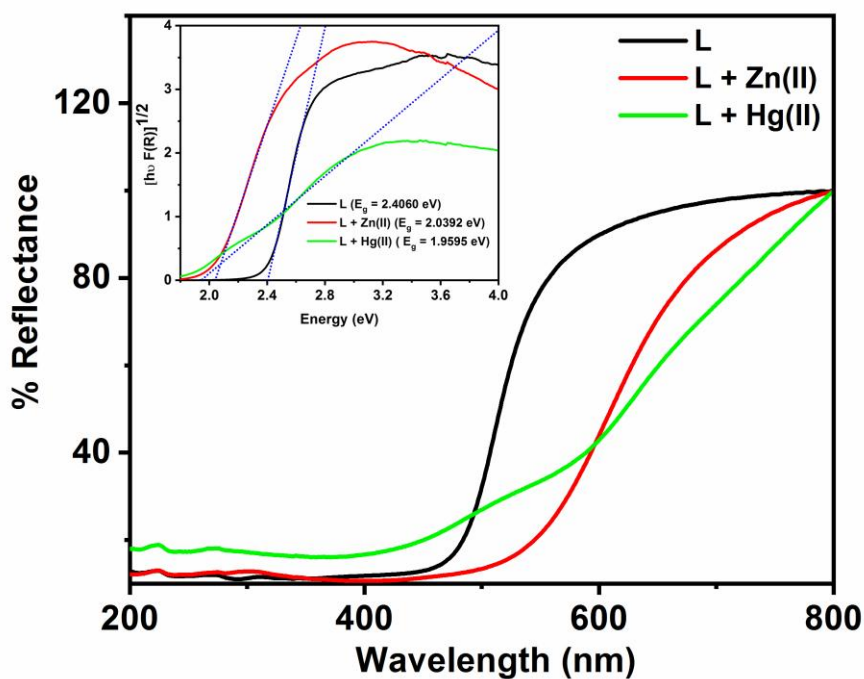

**Fig. S43.** Solid state UV-DRS spectra of **L**, **L** + **Zn(II)** and **L** + **Hg(II)**, Inset: Kubelka–Munk (K–M) plot used for band gap calculations.

### The Hirshfeld surface analysis

Hirshfeld surface analysis generates pictorial representations of intercontacts, molecular shapes, and intermolecular interactions within crystal packings. Hirshfeld surfaces and 2D fingerprint plots are used to gain a better understanding of short-range intermolecular forces in



crystal structures, as well as information about the relative surface area corresponding to each type of interaction.<sup>[9]</sup> The Hirshfeld surface areas were distributed over  $d_i$  (0.750 to 2.500 Å),  $d_e$  (0.750 to 2.500 Å),  $d_{\text{norm}}$  (-0.650 to 1.100 Å), shape index (-1.000 to 1.000 Å) and curvedness (-4.900 to 0.390 Å) (Fig. S44). The surface plot displayed by  $d_{\text{norm}}$  indicated the strongest (red colour), intermediate (white), and weakest intermolecular (blue) interactions. The hydrogen bonding interactions were indicated as red spots ( $d_{\text{norm}}$ ) as shown in Fig. 44c. The existence of red and blue triangles (highlighted) in the shape index (Fig. 44d) shows the presence of  $\pi$ - $\pi$  interactions. A lower number of blue and red triangles clearly indicated the weak  $\pi$ - $\pi$  interactions.<sup>[10]</sup> The intermolecular interactions of probe (**L**) are given in the 2D fingerprint plots (Fig. S45). The major H-H (41.9 %) contacts make the largest contribution to the Hirshfeld surfaces. The heteroatomic interactions of C-H (7.1 %), N-H (10.7 %), O-H (17.6 %) and S-H (12.5 %) which include all reciprocal contacts contributes to the Hirshfeld surface.

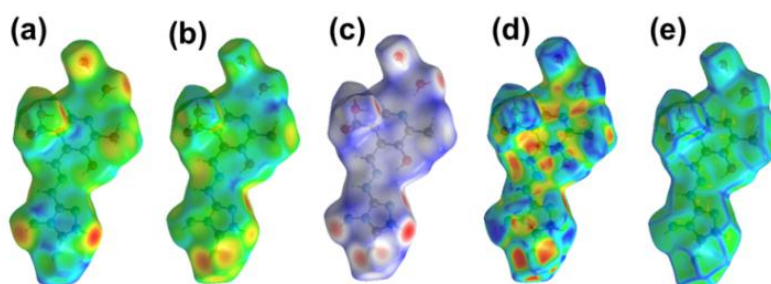

**Fig. S44.** Hirshfeld surfaces mapped over (a)  $d_i$ ; (b)  $d_e$ ; (c)  $d_{\text{norm}}$ ; (d) shape index; and (e) curvedness for probe (**L**).

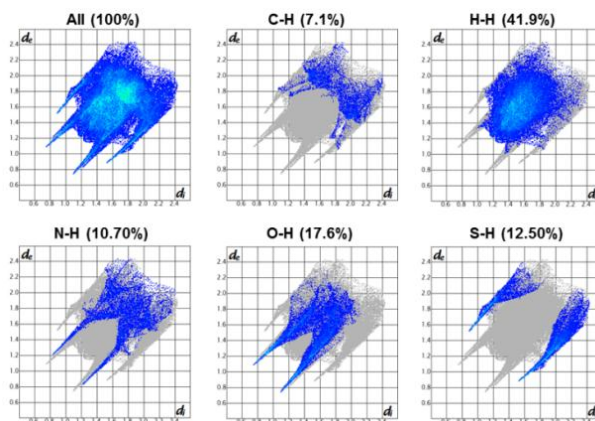

**Fig. S45.** Two-dimensional fingerprint (2D) plots of probe (**L**) generated from Crystal Explore software.

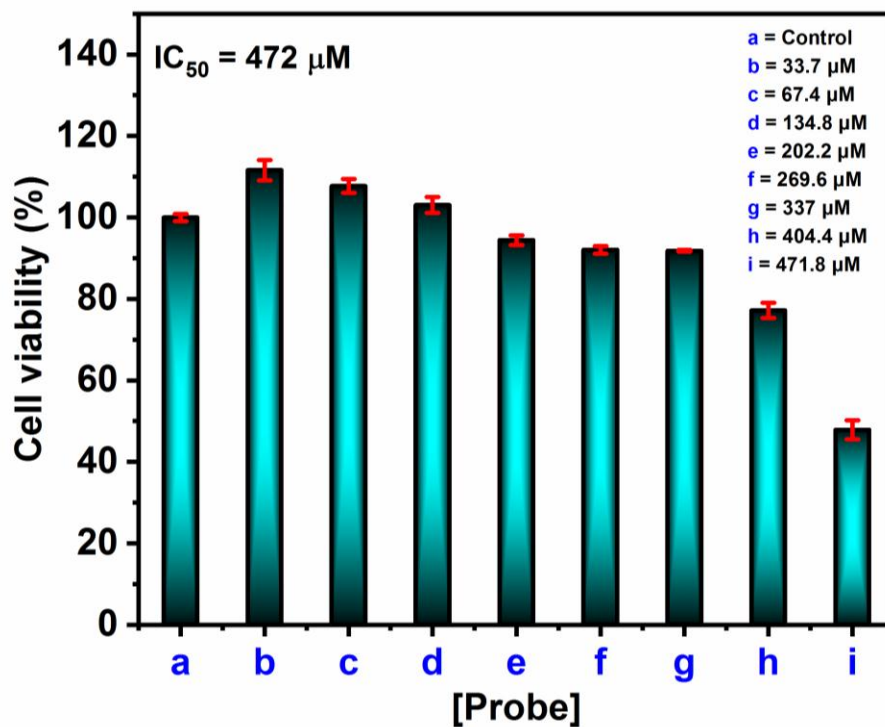

Fig. S46. Determination of cytotoxicity of L on A549 cells by MTT assay.

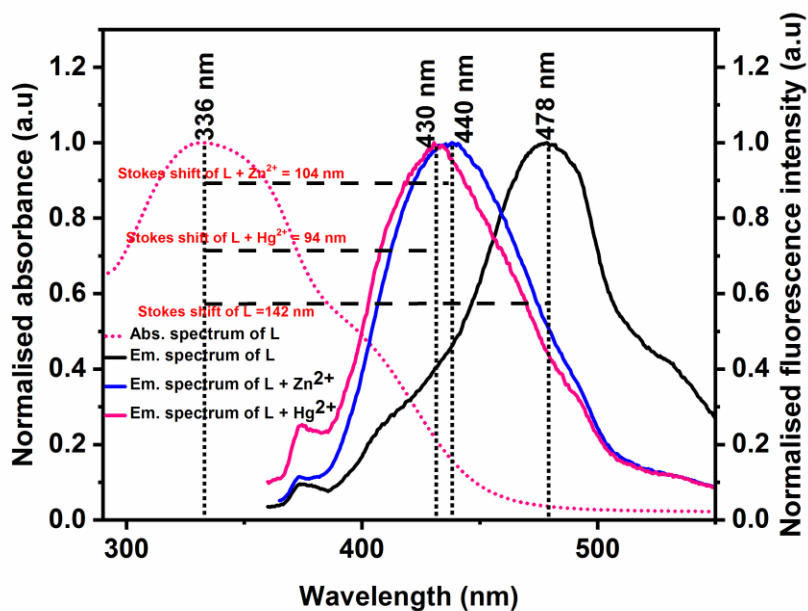

Fig. S47. Comparison plot of normalized absorbance and emission spectra of L, L + Zn<sup>2+</sup> and L + Hg<sup>2+</sup> (Stokes shift analysis).



**Table S1.** FT-IR assignments of **L**, **L + Zn<sup>2+</sup>** and **L + Hg<sup>2+</sup>**.

| S. No.                                                                           | Vibrational frequency, $\nu$ (cm <sup>-1</sup> ) |                            |                            | Vibrational assignment                                                           |
|----------------------------------------------------------------------------------|--------------------------------------------------|----------------------------|----------------------------|----------------------------------------------------------------------------------|
|                                                                                  | <b>L</b>                                         | <b>L + Zn<sup>2+</sup></b> | <b>L + Hg<sup>2+</sup></b> |                                                                                  |
| 1.                                                                               | 3446                                             | overtone                   | 3455                       | $\nu(\text{OH})$                                                                 |
| 2.                                                                               | 3324                                             |                            | overtone                   | $\nu_{\text{as}}(\text{N-H})_{\text{amino}}$                                     |
| 3.                                                                               | 3206                                             |                            |                            | $\nu_{\text{s}}(\text{N-H})_{\text{amino}}$                                      |
| 4.                                                                               | 3093                                             |                            |                            | $\nu(\text{N-H})_{\text{hydrazino}}$                                             |
| 5.                                                                               | 1626                                             | 1650                       | 1694                       | $\nu(\text{C=N})_{\text{azomethine}}$                                            |
| 6.                                                                               | 1477                                             | 1596                       | 1538                       | $\nu(\text{C=N})_{\text{triazole}}$                                              |
| 7.                                                                               | 1425                                             | 1417                       | 1448                       | Thioamide I, $\delta(\text{N-H}) + \nu(\text{C-N})$                              |
| 8.                                                                               | 1291                                             | 1220                       | 1193                       | Thioamide II, $\nu(\text{C=S}) + \nu(\text{C-N}) + \delta(\text{N-H})$           |
| 9.                                                                               | 1016                                             | 1018                       | 1009                       | Thioamide III, $\nu(\text{C-N})_{\text{major}} + \nu(\text{C=S})_{\text{minor}}$ |
| 10.                                                                              | 883                                              | 865                        | 846                        | Thioamide IV, $\nu(\text{C=S})$                                                  |
| N-H and O-H vibrational bands in complex were observed overtone with each others |                                                  |                            |                            |                                                                                  |

**Table S2.** Crystal data and structure refinement for **L**.

|                                 |                                                                 |                               |
|---------------------------------|-----------------------------------------------------------------|-------------------------------|
| Empirical formula               | C <sub>10</sub> H <sub>19</sub> N <sub>7</sub> O <sub>5</sub> S |                               |
| Formula weight                  | 349.38                                                          |                               |
| Temperature                     | 296(2) K                                                        |                               |
| Wavelength                      | 0.71073 Å                                                       |                               |
| Crystal system                  | Triclinic                                                       |                               |
| Space group                     | P -1                                                            |                               |
| Unit cell dimensions            | a = 6.8490(2) Å                                                 | $\alpha = 92.744(2)^\circ$ .  |
|                                 | b = 9.0017(2) Å                                                 | $\beta = 98.751(2)^\circ$ .   |
|                                 | c = 14.0341(3) Å                                                | $\gamma = 112.305(2)^\circ$ . |
| Volume                          | 785.88(4) Å <sup>3</sup>                                        |                               |
| Z                               | 2                                                               |                               |
| Density (calculated)            | 1.476 Mg/m <sup>3</sup>                                         |                               |
| Absorption coefficient          | 0.244 mm <sup>-1</sup>                                          |                               |
| F(000)                          | 368                                                             |                               |
| Crystal size                    | 0.120 x 0.100 x 0.080 mm <sup>3</sup>                           |                               |
| Theta range for data collection | 2.462 to 24.992°.                                               |                               |
| Index ranges                    | -8 ≤ h ≤ 8, -10 ≤ k ≤ 10, -16 ≤ l ≤ 16                          |                               |
| Reflections collected           | 9992                                                            |                               |
| Independent reflections         | 2774 [R(int) = 0.0248]                                          |                               |

|                                   |                                             |
|-----------------------------------|---------------------------------------------|
| Completeness to theta = 24.992°   | 100.0 %                                     |
| Absorption correction             | Semi-empirical from equivalents             |
| Max. and min. transmission        | 1.00000 and 0.77803                         |
| Refinement method                 | Full-matrix least-squares on F <sup>2</sup> |
| Data / restraints / parameters    | 2774 / 1 / 247                              |
| Goodness-of-fit on F <sup>2</sup> | 1.077                                       |
| Final R indices [I>2sigma(I)]     | R1 = 0.0357, wR2 = 0.0940                   |
| R indices (all data)              | R1 = 0.0403, wR2 = 0.0980                   |
| Extinction coefficient            | n/a                                         |
| Largest diff. peak and hole       | 0.235 and -0.279 e.Å <sup>-3</sup>          |

**Table S3.** Bond lengths [Å] and angles [°] for **L**.

|            |            |
|------------|------------|
| C(1)-N(1)  | 1.341(2)   |
| C(1)-C(2)  | 1.373(2)   |
| C(1)-H(1A) | 0.93       |
| C(2)-C(3)  | 1.405(2)   |
| C(2)-C(7)  | 1.511(2)   |
| C(3)-C(4)  | 1.403(2)   |
| C(3)-C(8)  | 1.451(2)   |
| C(4)-O(2)  | 1.351(2)   |
| C(4)-C(5)  | 1.397(2)   |
| C(5)-N(1)  | 1.332(2)   |
| C(5)-C(6)  | 1.497(2)   |
| C(6)-H(6A) | 0.96       |
| C(6)-H(6B) | 0.96       |
| C(6)-H(6C) | 0.96       |
| C(7)-O(1)  | 1.424(2)   |
| C(7)-H(7A) | 0.97       |
| C(7)-H(7B) | 0.97       |
| C(8)-N(2)  | 1.279(2)   |
| C(8)-H(8)  | 0.93       |
| C(9)-N(4)  | 1.301(2)   |
| C(9)-N(3)  | 1.349(2)   |
| C(9)-N(6)  | 1.364(2)   |
| C(10)-N(5) | 1.316(2)   |
| C(10)-N(6) | 1.372(2)   |
| C(10)-S(1) | 1.6789(18) |

|                  |            |
|------------------|------------|
| N(2)-N(3)        | 1.3595(19) |
| N(3)-H(3)        | 0.86       |
| N(4)-N(5)        | 1.387(2)   |
| N(5)-H(5)        | 0.91(2)    |
| N(6)-N(7)        | 1.3959(19) |
| N(7)-H(8B)       | 0.8615     |
| N(7)-H(8A)       | 0.89(2)    |
| O(1)-H(1)        | 0.74(2)    |
| O(2)-H(2)        | 0.82       |
| O(3)-H(3A)       | 0.81(3)    |
| O(3)-H(3B)       | 0.81(4)    |
| O(4)-H(4A)       | 0.84(3)    |
| O(4)-H(4B)       | 0.853(19)  |
| O(5)-H(5A)       | 0.81(3)    |
| O(5)-H(5B)       | 0.84(3)    |
| N(1)-C(1)-C(2)   | 124.22(17) |
| N(1)-C(1)-H(1A)  | 117.9      |
| C(2)-C(1)-H(1A)  | 117.9      |
| C(1)-C(2)-C(3)   | 118.45(15) |
| C(1)-C(2)-C(7)   | 119.81(16) |
| C(3)-C(2)-C(7)   | 121.72(15) |
| C(4)-C(3)-C(2)   | 117.18(15) |
| C(4)-C(3)-C(8)   | 121.63(15) |
| C(2)-C(3)-C(8)   | 121.18(15) |
| O(2)-C(4)-C(5)   | 116.43(15) |
| O(2)-C(4)-C(3)   | 123.33(15) |
| C(5)-C(4)-C(3)   | 120.23(16) |
| N(1)-C(5)-C(4)   | 121.44(15) |
| N(1)-C(5)-C(6)   | 118.78(16) |
| C(4)-C(5)-C(6)   | 119.77(17) |
| C(5)-C(6)-H(6A)  | 109.5      |
| C(5)-C(6)-H(6B)  | 109.5      |
| H(6A)-C(6)-H(6B) | 109.5      |
| C(5)-C(6)-H(6C)  | 109.5      |
| H(6A)-C(6)-H(6C) | 109.5      |
| H(6B)-C(6)-H(6C) | 109.5      |
| O(1)-C(7)-C(2)   | 113.32(15) |
| O(1)-C(7)-H(7A)  | 108.9      |
| C(2)-C(7)-H(7A)  | 108.9      |
| O(1)-C(7)-H(7B)  | 108.9      |
| C(2)-C(7)-H(7B)  | 108.9      |

|                  |            |
|------------------|------------|
| H(7A)-C(7)-H(7B) | 107.7      |
| N(2)-C(8)-C(3)   | 119.25(15) |
| N(2)-C(8)-H(8)   | 120.4      |
| C(3)-C(8)-H(8)   | 120.4      |
| N(4)-C(9)-N(3)   | 126.74(15) |
| N(4)-C(9)-N(6)   | 111.62(15) |
| N(3)-C(9)-N(6)   | 121.64(14) |
| N(5)-C(10)-N(6)  | 103.44(15) |
| N(5)-C(10)-S(1)  | 128.44(14) |
| N(6)-C(10)-S(1)  | 128.12(13) |
| C(5)-N(1)-C(1)   | 118.46(15) |
| C(8)-N(2)-N(3)   | 119.03(14) |
| C(9)-N(3)-N(2)   | 115.88(13) |
| C(9)-N(3)-H(3)   | 122.1      |
| N(2)-N(3)-H(3)   | 122.1      |
| C(9)-N(4)-N(5)   | 102.70(14) |
| C(10)-N(5)-N(4)  | 114.21(15) |
| C(10)-N(5)-H(5)  | 127.6(15)  |
| N(4)-N(5)-H(5)   | 117.4(15)  |
| C(9)-N(6)-C(10)  | 108.03(13) |
| C(9)-N(6)-N(7)   | 122.74(14) |
| C(10)-N(6)-N(7)  | 129.12(14) |
| N(6)-N(7)-H(8B)  | 109.3      |
| N(6)-N(7)-H(8A)  | 105.6(15)  |
| H(8B)-N(7)-H(8A) | 112.6      |
| C(7)-O(1)-H(1)   | 110.4(18)  |
| C(4)-O(2)-H(2)   | 109.5      |
| H(3A)-O(3)-H(3B) | 106(3)     |
| H(4A)-O(4)-H(4B) | 102(3)     |
| H(5A)-O(5)-H(5B) | 107(3)     |

---

Symmetry transformations used to generate equivalent atoms

**Table S4.** Summarized  $\lambda_{\text{max}}$  (nm) emission data of **L** in various solvents.

|          | <b>ACN</b> | <b>DMF</b> | <b>DMSO</b> | <b>MeOH</b> | <b>Water</b> | <b>Buffer</b> |
|----------|------------|------------|-------------|-------------|--------------|---------------|
| <b>L</b> | 550 nm     | 429 nm     | 426 nm      | 425 nm      | 379 nm       | 480 nm        |

**Table S5.** Summarized  $\lambda_{\text{max}}$  (nm) emission data of **L** in various ratios (v/v) of DMSO and water in HEPES buffered medium (pH = 8.0).

| <b>DMSO:water (v/v)</b> | <b>10%</b> | <b>20%</b> | <b>30%</b> | <b>40%</b> | <b>50%</b>     | <b>60%</b> | <b>70%</b> | <b>80%</b> | <b>90%</b> |
|-------------------------|------------|------------|------------|------------|----------------|------------|------------|------------|------------|
| <b>L</b>                | 470 nm     | 478 nm     | 478 nm     | 478 nm     | 478 nm         | 477 nm     | 474 nm     | 438 nm     | 439 nm     |
| <b>Intensity (a.u)</b>  | 573.404    | 706.404    | 829.842    | 896.842    | <b>1015.97</b> | 660.167    | 420.247    | 361.303    | 360.999    |

**Table S6.** Solid and solution state fluorescence lifetime data of **L**, **ZnL<sub>2</sub>**, and **Hg<sub>2</sub>L<sub>2</sub>**.

|                                         | <b>B<sub>1</sub></b> | <b>B<sub>2</sub></b> | <b>B<sub>3</sub></b> | <b><math>\tau_1</math> (ns)</b> | <b><math>\tau_2</math> (ns)</b> | <b><math>\tau_3</math> (ns)</b> | <b><math>\chi^2</math></b> | <b><math>\tau_{\text{av}}</math> (ns)</b> | <b><math>\Phi_f</math></b> | <b><math>k_r</math> (ns<sup>-1</sup>)</b> | <b><math>k_{\text{nr}}</math> (ns<sup>-1</sup>)</b> | <b><math>\frac{k_r}{k_{\text{nr}}}</math></b> |
|-----------------------------------------|----------------------|----------------------|----------------------|---------------------------------|---------------------------------|---------------------------------|----------------------------|-------------------------------------------|----------------------------|-------------------------------------------|-----------------------------------------------------|-----------------------------------------------|
| <b>(a) Solution state lifetime data</b> |                      |                      |                      |                                 |                                 |                                 |                            |                                           |                            |                                           |                                                     |                                               |
| <b>L</b>                                | 0.1175               | 0.0105               | 0.1129               | 2.6466                          | 4.0472                          | 0.1821                          | 1.2529                     | 1.5536                                    | 0.2316                     | 0.1490                                    | 0.4946                                              | 0.3012                                        |
| <b>L + Zn(II)</b>                       | 0.3388               | 0.5013               | 0.0094               | 1.1272                          | 3.0904                          | 13.2159                         | 1.1577                     | 2.4201                                    | 0.3850                     | 0.1590                                    | 0.2542                                              | 0.6254                                        |
| <b>L + Hg(II)</b>                       | 0.0593               | 0.0077               | $1.2706 \times 10^7$ | 1.0810                          | 9.0093                          | 0.0066                          | 1.4592                     | 0.0066                                    | 0.0416                     | 6.3030                                    | 145.2121                                            | 0.0434                                        |
| <b>(b) Solid state lifetime data</b>    |                      |                      |                      |                                 |                                 |                                 |                            |                                           |                            |                                           |                                                     |                                               |
| <b>L</b>                                | 0.0135               | 0.0011               | 1.9733               | 6.6721                          | 43.7577                         | 0.4710                          | 1.5795                     | 0.5380                                    |                            |                                           | -                                                   |                                               |
| <b>L + Zn(II)</b>                       | -0.0065              | 0.0007               | 0.8111               | 0.7167                          | 36.9418                         | 0.2063                          | 1.4965                     | 0.2424                                    |                            |                                           | -                                                   |                                               |
| <b>L + Hg(II)</b>                       | 0.0290               | 0.0004               | 1.1296               | 0.4856                          | 30.7468                         | 0.1421                          | 1.4697                     | 0.1625                                    |                            |                                           | -                                                   |                                               |

$\Phi_f$  = Fluorescence quantum yield determined based on relative standard method (quinine sulfate as standard)

**Table S7.** The Cartesian coordinates of **L** (enol-thione), **ZnL<sub>2</sub>** and **Hg<sub>2</sub>L<sub>2</sub>** calculated from Gaussian-09 at B3LYP computational level using IEF-PCM calculation (**water as solvent**).

| <b>L (enol-thione)</b> |          |          |          | <b>ZnL<sub>2</sub></b> |          |          | <b>Hg<sub>2</sub>L<sub>2</sub></b> |    |          |          |          |
|------------------------|----------|----------|----------|------------------------|----------|----------|------------------------------------|----|----------|----------|----------|
| C                      | 4.80547  | 0.48956  | -0.15016 | C                      | -4.67713 | 1.29266  | -2.96325                           | Hg | -3.48257 | 2.29401  | -0.61677 |
| H                      | 5.70724  | 1.09272  | -0.21596 | H                      | -5.53807 | 1.69471  | -3.48958                           | S  | -3.00967 | 1.48107  | 1.84359  |
| C                      | 3.56264  | 1.10067  | -0.19737 | C                      | -4.00777 | 2.06212  | -2.03929                           | N  | -0.18996 | -1.16572 | 1.21983  |
| C                      | 2.41274  | 0.27559  | -0.10527 | C                      | -2.87912 | 1.49236  | -1.36954                           | N  | -1.50928 | -0.76825 | 1.21819  |
| C                      | 2.61358  | -1.1157  | 0.00292  | C                      | -2.51691 | 0.14138  | -1.66958                           | N  | -0.3285  | 0.88352  | 2.01339  |
| C                      | 3.93311  | -1.62828 | 0.04193  | C                      | -3.3158  | -0.53932 | -2.66946                           | N  | 1.85155  | -0.13992 | 1.95402  |
| C                      | 4.15178  | -3.10917 | 0.17121  | C                      | -2.95284 | -1.95227 | -3.02718                           | C  | 0.49204  | -0.16477 | 1.73181  |
| H                      | 3.69898  | -3.64707 | -0.66702 | H                      | -3.032   | -2.60861 | -2.15469                           | C  | -1.59604 | 0.47863  | 1.66075  |
| H                      | 3.68253  | -3.49823 | 1.07958  | H                      | -1.91452 | -2.01417 | -3.3662                            | Hg | -3.23753 | -2.38503 | 0.50966  |
| H                      | 5.22166  | -3.31019 | 0.1976   | H                      | -3.62049 | -2.30723 | -3.81131                           | N  | -1.89617 | 0.91474  | -1.93402 |
| C                      | 3.47638  | 2.59888  | -0.37483 | C                      | -4.51309 | 3.45719  | -1.75166                           | S  | -3.89505 | -0.85423 | -1.49513 |
| H                      | 4.49043  | 3.00587  | -0.46151 | H                      | -5.41667 | 3.6358   | -2.345                             | Cl | -3.61941 | -4.43447 | 1.81421  |
| H                      | 2.94794  | 2.85268  | -1.29791 | H                      | -4.79141 | 3.56768  | -0.69969                           | C  | -2.25552 | -0.34165 | -1.75448 |
| C                      | 1.07643  | 0.85669  | -0.10899 | C                      | -2.14615 | 2.30536  | -0.43887                           | N  | -0.53165 | 0.97868  | -2.15014 |
| H                      | 0.99286  | 1.94358  | -0.07816 | H                      | -2.45269 | 3.34884  | -0.3671                            | C  | -0.09357 | -0.24518 | -2.10556 |
| C                      | -2.31759 | -0.07099 | -0.0471  | C                      | 0.56969  | 2.47373  | 1.73025                            | N  | -1.12747 | -1.13252 | -1.86223 |
| C                      | -4.53472 | -0.45105 | 0.00925  | C                      | 2.47358  | 2.56266  | 2.9263                             | Cl | -4.67995 | 4.1365   | -1.74909 |
| N                      | 4.99348  | -0.83306 | -0.03051 | N                      | -4.33844 | 0.02034  | -3.27709                           | C  | 6.38558  | 3.3202   | 0.1174   |
| N                      | 0.03124  | 0.10363  | -0.09873 | N                      | -1.13325 | 1.91467  | 0.27221                            | C  | 5.70688  | 2.15018  | 0.44199  |
| N                      | -1.18667 | 0.69062  | -0.08416 | N                      | -0.55655 | 2.87978  | 1.0958                             | C  | 4.49477  | 2.25159  | 1.15792  |
| H                      | -1.30459 | 1.69997  | -0.07711 | H                      | -0.621   | 3.86424  | 0.85406                            | C  | 4.05185  | 3.54281  | 1.49424  |
| N                      | -2.41502 | -1.3674  | -0.0289  | N                      | 0.96506  | 1.23167  | 1.81671                            | C  | 4.82186  | 4.6619   | 1.13287  |
| N                      | -3.78734 | -1.57352 | 0.00524  | N                      | 2.14221  | 1.3111   | 2.54547                            | C  | 4.37112  | 6.05498  | 1.49762  |
| N                      | -3.5538  | 0.53952  | -0.02563 | N                      | 1.42619  | 3.31884  | 2.38216                            | C  | 6.26599  | 0.8117   | 0.00939  |
| N                      | -3.73661 | 1.91889  | -0.0352  | N                      | 1.27233  | 4.7009   | 2.40206                            | C  | 3.75318  | 1.03498  | 1.51974  |
| H                      | -4.31187 | 2.1545   | -0.84223 | H                      | 1.18419  | 4.99795  | 3.37201                            | N  | 5.96295  | 4.54103  | 0.45676  |
| O                      | 2.74805  | 3.26888  | 0.66121  | O                      | -3.54634 | 4.49255  | -1.98517                           | N  | 2.47754  | 1.02688  | 1.61654  |
| O                      | 1.61314  | -2.00956 | 0.07964  | O                      | -1.54823 | -0.50184 | -1.12247                           | O  | 2.8777   | 3.69756  | 2.17998  |
| H                      | 0.75457  | -1.53789 | 0.0227   | S                      | 3.76342  | 3.13642  | 3.80505                            | O  | 7.1179   | 0.98778  | -1.10999 |
| S                      | -6.18713 | -0.22184 | 0.04571  | H                      | -3.21693 | 4.37843  | -2.88347                           | N  | 0.02799  | 2.0505   | 2.70756  |
| H                      | 3.15546  | 3.03253  | 1.50166  | H                      | 2.6659   | 0.47822  | 2.75607                            | N  | 1.19711  | -0.59953 | -2.47332 |
| H                      | -4.15035 | -2.5119  | 0.02439  | H                      | 2.12975  | 5.11577  | 2.04101                            | C  | 6.32435  | -3.24896 | -0.77825 |
| H                      | -4.2762  | 2.17042  | 0.79147  | Zn                     | -0.01316 | -0.00802 | 0.09726                            | C  | 5.50869  | -2.43757 | -1.55675 |
|                        |          |          |          | O                      | 1.50271  | 0.58275  | -1.10546                           | C  | 4.14944  | -2.30191 | -1.17642 |
|                        |          |          |          | C                      | 2.4764   | -0.00791 | -1.70047                           | C  | 3.7383   | -2.9724  | -0.00643 |
|                        |          |          |          | C                      | 2.85888  | -1.37109 | -1.49535                           | C  | 4.64848  | -3.77277 | 0.71154  |
|                        |          |          |          | C                      | 3.25965  | 0.75041  | -2.65594                           | C  | 4.20498  | -4.50487 | 1.94697  |
|                        |          |          |          | C                      | 3.99035  | -1.87835 | -2.20913                           | C  | 6.10256  | -1.74117 | -2.76266 |
|                        |          |          |          | C                      | 2.14441  | -2.2542  | -0.61601                           | C  | 3.22154  | -1.47659 | -1.94237 |

|   |          |          |          |   |          |          |          |
|---|----------|----------|----------|---|----------|----------|----------|
| C | 2.87552  | 2.17938  | -2.91422 | N | 5.9109   | -3.9022  | 0.3149   |
| N | 4.28589  | 0.24783  | -3.3058  | N | 1.96444  | -1.3997  | -1.66573 |
| C | 4.64335  | -1.03831 | -3.08182 | O | 2.48558  | -2.86295 | 0.50152  |
| C | 4.51816  | -3.28192 | -2.01946 | O | 7.49401  | -1.50534 | -2.51347 |
| H | 2.46705  | -3.29527 | -0.61389 | N | -1.07002 | -2.46029 | -1.42915 |
| N | 1.13101  | -1.92615 | 0.12555  | H | 2.3214   | -1.03389 | 1.81219  |
| H | 2.94753  | 2.77454  | -1.99835 | H | 7.30177  | 3.26236  | -0.45586 |
| H | 1.83549  | 2.24954  | -3.24642 | H | 5.10921  | 6.7653   | 1.12959  |
| H | 3.5358   | 2.59747  | -3.67304 | H | 4.28654  | 6.19402  | 2.58346  |
| H | 5.50664  | -1.39152 | -3.63853 | H | 3.40204  | 6.30273  | 1.0493   |
| H | 5.41767  | -3.40688 | -2.63236 | H | 5.44064  | 0.13474  | -0.23936 |
| H | 4.80975  | -3.45745 | -0.97998 | H | 6.81149  | 0.35383  | 0.85029  |
| O | 3.56418  | -4.31426 | -2.31102 | H | 4.32974  | 0.12011  | 1.68189  |
| N | 0.57701  | -2.95136 | 0.89007  | H | 2.82521  | 4.60581  | 2.49764  |
| H | 3.22688  | -4.14957 | -3.19847 | H | 7.45008  | 0.11852  | -1.38131 |
| C | -0.54802 | -2.60469 | 1.56067  | H | -0.80143 | 2.64146  | 2.7003   |
| H | 0.65564  | -3.91746 | 0.5865   | H | 0.79834  | 2.49191  | 2.20515  |
| N | -0.96358 | -1.37746 | 1.72646  | H | 1.67564  | 0.17171  | -2.93286 |
| N | -1.38032 | -3.50234 | 2.17248  | H | 7.36766  | -3.36589 | -1.04196 |
| N | -2.12818 | -1.52101 | 2.46538  | H | 5.02806  | -5.11969 | 2.30721  |
| C | -2.4323  | -2.79889 | 2.77531  | H | 3.33574  | -5.13555 | 1.74291  |
| N | -1.20088 | -4.88003 | 2.10944  | H | 3.9069   | -3.80938 | 2.73788  |
| H | -2.6639  | -0.71177 | 2.73097  | H | 5.6069   | -0.78323 | -2.95059 |
| S | -3.6989  | -3.44671 | 3.63613  | H | 5.98225  | -2.36677 | -3.65668 |
| H | -1.08806 | -5.23109 | 3.05858  | H | 3.61975  | -0.90379 | -2.78149 |
| H | -2.05741 | -5.28996 | 1.74079  | H | 1.92815  | -2.35982 | -0.12728 |
|   |          |          |          | H | 7.91867  | -1.27835 | -3.34722 |
|   |          |          |          | H | -0.36337 | -2.5292  | -0.69808 |
|   |          |          |          | H | -0.86501 | -3.08119 | -2.20563 |

**Table S8.** The Cartesian coordinates of **L** (enol-thione), **ZnL<sub>2</sub>** and **Hg<sub>2</sub>L<sub>2</sub>** calculated from Gaussian-09 at B3LYP computational level using IEF-PCM calculation (**DMSO as solvent**).

| <b>L (enol-thione)</b> |         |          |          | <b>ZnL<sub>2</sub></b> |          |          | <b>Hg<sub>2</sub>L<sub>2</sub></b> |    |          |          |          |
|------------------------|---------|----------|----------|------------------------|----------|----------|------------------------------------|----|----------|----------|----------|
| C                      | 4.80547 | 0.48956  | -0.15016 | C                      | -4.67713 | 1.29266  | -2.96325                           | Hg | -3.48257 | 2.29401  | -0.61677 |
| H                      | 5.70724 | 1.09272  | -0.21596 | H                      | -5.53807 | 1.69471  | -3.48958                           | S  | -3.00967 | 1.48107  | 1.84359  |
| C                      | 3.56264 | 1.10067  | -0.19737 | C                      | -4.00777 | 2.06212  | -2.03929                           | N  | -0.18996 | -1.16572 | 1.21983  |
| C                      | 2.41274 | 0.27559  | -0.10527 | C                      | -2.87912 | 1.49236  | -1.36954                           | N  | -1.50928 | -0.76825 | 1.21819  |
| C                      | 2.61358 | -1.1157  | 0.00292  | C                      | -2.51691 | 0.14138  | -1.66958                           | N  | -0.3285  | 0.88352  | 2.01339  |
| C                      | 3.93311 | -1.62828 | 0.04193  | C                      | -3.3158  | -0.53932 | -2.66946                           | N  | 1.85155  | -0.13992 | 1.95402  |
| C                      | 4.15178 | -3.10917 | 0.17121  | C                      | -2.95284 | -1.95227 | -3.02718                           | C  | 0.49204  | -0.16477 | 1.73181  |
| H                      | 3.69898 | -3.64707 | -0.66702 | H                      | -3.032   | -2.60861 | -2.15469                           | C  | -1.59604 | 0.47863  | 1.66075  |

|   |          |          |          |    |          |          |          |    |          |          |          |
|---|----------|----------|----------|----|----------|----------|----------|----|----------|----------|----------|
| H | 3.68253  | -3.49823 | 1.07958  | H  | -1.91452 | -2.01417 | -3.3662  | Hg | -3.23753 | -2.38503 | 0.50966  |
| H | 5.22166  | -3.31019 | 0.1976   | H  | -3.62049 | -2.30723 | -3.81131 | N  | -1.89617 | 0.91474  | -1.93402 |
| C | 3.47638  | 2.59888  | -0.37483 | C  | -4.51309 | 3.45719  | -1.75166 | S  | -3.89505 | -0.85423 | -1.49513 |
| H | 4.49043  | 3.00587  | -0.46151 | H  | -5.41667 | 3.6358   | -2.345   | Cl | -3.61941 | -4.43447 | 1.81421  |
| H | 2.94794  | 2.85268  | -1.29791 | H  | -4.79141 | 3.56768  | -0.69969 | C  | -2.25552 | -0.34165 | -1.75448 |
| C | 1.07643  | 0.85669  | -0.10899 | C  | -2.14615 | 2.30536  | -0.43887 | N  | -0.53165 | 0.97868  | -2.15014 |
| H | 0.99286  | 1.94358  | -0.07816 | H  | -2.45269 | 3.34884  | -0.3671  | C  | -0.09357 | -0.24518 | -2.10556 |
| C | -2.31759 | -0.07099 | -0.0471  | C  | 0.56969  | 2.47373  | 1.73025  | N  | -1.12747 | -1.13252 | -1.86223 |
| C | -4.53472 | -0.45105 | 0.00925  | C  | 2.47358  | 2.56266  | 2.9263   | Cl | -4.67995 | 4.1365   | -1.74909 |
| N | 4.99348  | -0.83306 | -0.03051 | N  | -4.33844 | 0.02034  | -3.27709 | C  | 6.38558  | 3.3202   | 0.1174   |
| N | 0.03124  | 0.10363  | -0.09873 | N  | -1.13325 | 1.91467  | 0.27221  | C  | 5.70688  | 2.15018  | 0.44199  |
| N | -1.18667 | 0.69062  | -0.08416 | N  | -0.55655 | 2.87978  | 1.0958   | C  | 4.49477  | 2.25159  | 1.15792  |
| H | -1.30459 | 1.69997  | -0.07711 | H  | -0.621   | 3.86424  | 0.85406  | C  | 4.05185  | 3.54281  | 1.49424  |
| N | -2.41502 | -1.3674  | -0.0289  | N  | 0.96506  | 1.23167  | 1.81671  | C  | 4.82186  | 4.6619   | 1.13287  |
| N | -3.78734 | -1.57352 | 0.00524  | N  | 2.14221  | 1.3111   | 2.54547  | C  | 4.37112  | 6.05498  | 1.49762  |
| N | -3.5538  | 0.53952  | -0.02563 | N  | 1.42619  | 3.31884  | 2.38216  | C  | 6.26599  | 0.8117   | 0.00939  |
| N | -3.73661 | 1.91889  | -0.0352  | N  | 1.27233  | 4.7009   | 2.40206  | C  | 3.75318  | 1.03498  | 1.51974  |
| H | -4.31187 | 2.1545   | -0.84223 | H  | 1.18419  | 4.99795  | 3.37201  | N  | 5.96295  | 4.54103  | 0.45676  |
| O | 2.74805  | 3.26888  | 0.66121  | O  | -3.54634 | 4.49255  | -1.98517 | N  | 2.47754  | 1.02688  | 1.61654  |
| O | 1.61314  | -2.00956 | 0.07964  | O  | -1.54823 | -0.50184 | -1.12247 | O  | 2.8777   | 3.69756  | 2.17998  |
| H | 0.75457  | -1.53789 | 0.0227   | S  | 3.76342  | 3.13642  | 3.80505  | O  | 7.1179   | 0.98778  | -1.10999 |
| S | -6.18713 | -0.22184 | 0.04571  | H  | -3.21693 | 4.37843  | -2.88347 | N  | 0.02799  | 2.0505   | 2.70756  |
| H | 3.15546  | 3.03253  | 1.50166  | H  | 2.6659   | 0.47822  | 2.75607  | N  | 1.19711  | -0.59953 | -2.47332 |
| H | -4.15035 | -2.5119  | 0.02439  | H  | 2.12975  | 5.11577  | 2.04101  | C  | 6.32435  | -3.24896 | -0.77825 |
| H | -4.2762  | 2.17042  | 0.79147  | Zn | -0.01316 | -0.00802 | 0.09726  | C  | 5.50869  | -2.43757 | -1.55675 |
|   |          |          |          | O  | 1.50271  | 0.58275  | -1.10546 | C  | 4.14944  | -2.30191 | -1.17642 |
|   |          |          |          | C  | 2.4764   | -0.00791 | -1.70047 | C  | 3.7383   | -2.9724  | -0.00643 |
|   |          |          |          | C  | 2.85888  | -1.37109 | -1.49535 | C  | 4.64848  | -3.77277 | 0.71154  |
|   |          |          |          | C  | 3.25965  | 0.75041  | -2.65594 | C  | 4.20498  | -4.50487 | 1.94697  |
|   |          |          |          | C  | 3.99035  | -1.87835 | -2.20913 | C  | 6.10256  | -1.74117 | -2.76266 |
|   |          |          |          | C  | 2.14441  | -2.2542  | -0.61601 | C  | 3.22154  | -1.47659 | -1.94237 |
|   |          |          |          | C  | 2.87552  | 2.17938  | -2.91422 | N  | 5.9109   | -3.9022  | 0.3149   |
|   |          |          |          | N  | 4.28589  | 0.24783  | -3.3058  | N  | 1.96444  | -1.3997  | -1.66573 |
|   |          |          |          | C  | 4.64335  | -1.03831 | -3.08182 | O  | 2.48558  | -2.86295 | 0.50152  |
|   |          |          |          | C  | 4.51816  | -3.28192 | -2.01946 | O  | 7.49401  | -1.50534 | -2.51347 |
|   |          |          |          | H  | 2.46705  | -3.29527 | -0.61389 | N  | -1.07002 | -2.46029 | -1.42915 |
|   |          |          |          | N  | 1.13101  | -1.92615 | 0.12555  | H  | 2.3214   | -1.03389 | 1.81219  |
|   |          |          |          | H  | 2.94753  | 2.77454  | -1.99835 | H  | 7.30177  | 3.26236  | -0.45586 |
|   |          |          |          | H  | 1.83549  | 2.24954  | -3.24642 | H  | 5.10921  | 6.7653   | 1.12959  |
|   |          |          |          | H  | 3.5358   | 2.59747  | -3.67304 | H  | 4.28654  | 6.19402  | 2.58346  |
|   |          |          |          | H  | 5.50664  | -1.39152 | -3.63853 | H  | 3.40204  | 6.30273  | 1.0493   |
|   |          |          |          | H  | 5.41767  | -3.40688 | -2.63236 | H  | 5.44064  | 0.13474  | -0.23936 |
|   |          |          |          | H  | 4.80975  | -3.45745 | -0.97998 | H  | 6.81149  | 0.35383  | 0.85029  |



|   |          |          |          |   |          |          |          |
|---|----------|----------|----------|---|----------|----------|----------|
| O | 3.56418  | -4.31426 | -2.31102 | H | 4.32974  | 0.12011  | 1.68189  |
| N | 0.57701  | -2.95136 | 0.89007  | H | 2.82521  | 4.60581  | 2.49764  |
| H | 3.22688  | -4.14957 | -3.19847 | H | 7.45008  | 0.11852  | -1.38131 |
| C | -0.54802 | -2.60469 | 1.56067  | H | -0.80143 | 2.64146  | 2.7003   |
| H | 0.65564  | -3.91746 | 0.5865   | H | 0.79834  | 2.49191  | 2.20515  |
| N | -0.96358 | -1.37746 | 1.72646  | H | 1.67564  | 0.17171  | -2.93286 |
| N | -1.38032 | -3.50234 | 2.17248  | H | 7.36766  | -3.36589 | -1.04196 |
| N | -2.12818 | -1.52101 | 2.46538  | H | 5.02806  | -5.11969 | 2.30721  |
| C | -2.4323  | -2.79889 | 2.77531  | H | 3.33574  | -5.13555 | 1.74291  |
| N | -1.20088 | -4.88003 | 2.10944  | H | 3.9069   | -3.80938 | 2.73788  |
| H | -2.6639  | -0.71177 | 2.73097  | H | 5.6069   | -0.78323 | -2.95059 |
| S | -3.6989  | -3.44671 | 3.63613  | H | 5.98225  | -2.36677 | -3.65668 |
| H | -1.08806 | -5.23109 | 3.05858  | H | 3.61975  | -0.90379 | -2.78149 |
| H | -2.05741 | -5.28996 | 1.74079  | H | 1.92815  | -2.35982 | -0.12728 |
|   |          |          |          | H | 7.91867  | -1.27835 | -3.34722 |
|   |          |          |          | H | -0.36337 | -2.5292  | -0.69808 |
|   |          |          |          | H | -0.86501 | -3.08119 | -2.20563 |

**Table S9.** Major UV-Vis electronic transitions and corresponding orbital contributions for **L**, **ZnL<sub>2</sub>**, and **Hg<sub>2</sub>L<sub>2</sub>**.

|                                    | Solvent system | Experimental wavelength (nm) | Theoretical wavelength (nm) | Oscillator strength (f) | Major contributing transition                                                                                                                         | Character               |
|------------------------------------|----------------|------------------------------|-----------------------------|-------------------------|-------------------------------------------------------------------------------------------------------------------------------------------------------|-------------------------|
| <b>L</b>                           | <b>Water</b>   | 257                          | 280.6703                    | 0.5393                  | HOMO-3→LUMO (88%)<br>HOMO-4→LUMO (4%)                                                                                                                 | $\pi \rightarrow \pi^*$ |
|                                    |                | 336                          | 359.1221                    | 0.3750                  | HOMO→LUMO (99%)                                                                                                                                       |                         |
|                                    | <b>DMSO</b>    | 272                          | 281.2306                    | 0.5484                  | HOMO-3→LUMO (88%)<br>HOMO-4→LUMO (4%)                                                                                                                 |                         |
|                                    |                | 336                          | 360.1549                    | 0.3861                  | HOMO→LUMO (99%)                                                                                                                                       |                         |
| <b>ZnL<sub>2</sub></b>             | <b>Water</b>   | 247                          | 247.5112                    | 0.3061                  | HOMO-2→LUMO+2 (75%)<br>HOMO-13→LUMO+1 (2%)<br>HOMO-12→LUMO (2%)<br>HOMO-11→LUMO+1 (2%)<br>HOMO-10→LUMO (3%)<br>HOMO-3→LUMO+3 (4%)<br>HOMO→LUMO+4 (5%) | $\pi \rightarrow \pi^*$ |
|                                    |                | 400                          | 380.9362                    | 0.3292                  | HOMO-1→LUMO+1 (60%)<br>HOMO→LUMO (35%)                                                                                                                | <b>ILCT</b>             |
|                                    | <b>DMSO</b>    | 271                          | 280.9247                    | 0.4026                  | HOMO-9→LUMO (54%)<br>HOMO-8→LUMO+1 (26%)<br>HOMO→LUMO+2 (10%)<br>HOMO-1→L+3 (4%)                                                                      | $\pi \rightarrow \pi^*$ |
|                                    |                | 407                          | 382.0985                    | 0.3403                  | HOMO-1→LUMO+1 (61%)<br>HOMO→LUMO (34%)                                                                                                                | <b>ILCT + LMCT</b>      |
| <b>Hg<sub>2</sub>L<sub>2</sub></b> | <b>Water</b>   | 362                          | 363.0657                    | 0.1866                  | HOMO-1→LUMO (93%)<br>HOMO→LUMO (5%)                                                                                                                   | <b>ILCT</b>             |
|                                    |                |                              | 336.2807                    | 0.3309                  | HOMO→LUMO+1 (85%)<br>HOMO-1→LUMO+1 (4%)<br>HOMO→LUMO+2 (8%)                                                                                           |                         |
|                                    | <b>DMSO</b>    | 366                          | 363.2359                    | 0.1977                  | HOMO-1→LUMO (93%)<br>HOMO→LUMO (4%)                                                                                                                   |                         |
|                                    |                |                              | 336.6093                    | 0.3397                  | HOMO→LUMO+1 (83%)<br>HOMO→LUMO+2 (10%)<br>HOMO-1→LUMO+1 (3%)                                                                                          |                         |

**Table S10.** Selected Frontier molecular orbitals HOMO-LUMO diagram of probe (**L**) in water and DMSO medium.

| Molecular orbital state | L (Enol-thione form)                                                                |         |                                                                                      |         |
|-------------------------|-------------------------------------------------------------------------------------|---------|--------------------------------------------------------------------------------------|---------|
|                         | Water medium                                                                        | E (eV)  | DMSO medium                                                                          | E (eV)  |
| LUMO+4                  | 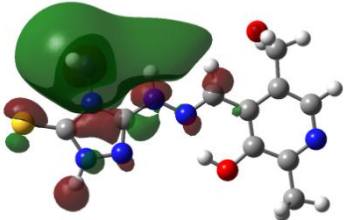   | 0.9319  |    | 0.9235  |
| LUMO+3                  |    | 0.3662  |    | 0.3651  |
| LUMO+2                  |   | -0.4430 |   | -0.4432 |
| LUMO+1                  |  | -0.5382 |  | -0.5371 |
| LUMO                    |  | -2.0623 |  | -2.0637 |

|        |                                                                                     |         |                                                                                      |         |
|--------|-------------------------------------------------------------------------------------|---------|--------------------------------------------------------------------------------------|---------|
| HOMO   | 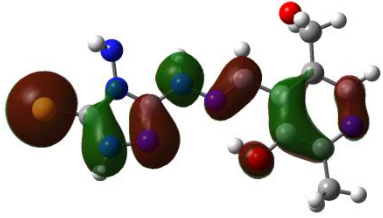   | -5.9443 |    | -5.9435 |
| HOMO-1 |    | -6.4518 |    | -6.4507 |
| HOMO-2 |    | -6.5927 |    | -6.5884 |
| HOMO-3 |   | -6.9394 |   | -6.9399 |
| HOMO-4 |  | -7.2142 |  | -7.2121 |

**Table S11.** Selected Frontier molecular orbitals HOMO-LUMO diagram of zinc(II) complex ( $\text{ZnL}_2$ ) in water and DMSO medium.

| Molecular orbital state | $\text{ZnL}_2$                                                                      |         |                                                                                      |         |
|-------------------------|-------------------------------------------------------------------------------------|---------|--------------------------------------------------------------------------------------|---------|
|                         | Water medium                                                                        | E (eV)  | DMSO medium                                                                          | E (eV)  |
| LUMO+4                  | 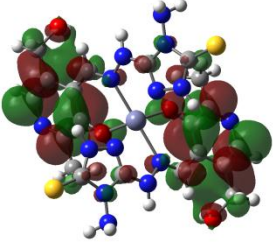   | -0.1150 |    | -0.1099 |
| LUMO+3                  |    | -0.7257 |    | -0.7270 |
| LUMO+2                  |   | -0.7379 |   | -0.7396 |
| LUMO+1                  |  | -2.0139 |  | -2.0139 |
| LUMO                    |  | -2.0509 |  | -2.0506 |

|        |                                                                                     |         |                                                                                      |         |
|--------|-------------------------------------------------------------------------------------|---------|--------------------------------------------------------------------------------------|---------|
| HOMO   | 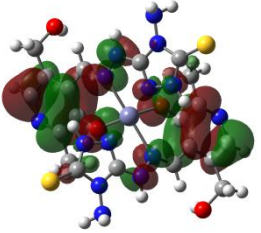   | -5.6855 |    | -5.6836 |
| HOMO-1 |    | -5.6904 |    | -5.6888 |
| HOMO-2 |    | -6.2101 |    | -6.2104 |
| HOMO-3 |  | -6.3018 |  | -6.3016 |
| HOMO-4 |  | -6.5663 |  | -6.5625 |
| HOMO-5 |  | -6.6305 |  | -6.6267 |



|         |                                                                                     |         |                                                                                      |         |
|---------|-------------------------------------------------------------------------------------|---------|--------------------------------------------------------------------------------------|---------|
| HOMO-6  | 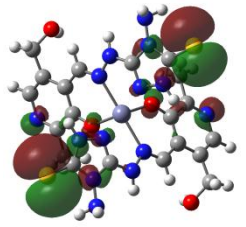   | -6.6986 |    | -6.6967 |
| HOMO-7  |    | -6.7018 |    | -6.6999 |
| HOMO-8  |    | -6.9674 |    | -6.9674 |
| HOMO-9  |  | -6.9764 |  | -6.9761 |
| HOMO-10 |  | -7.7574 |  | -7.7576 |
| HOMO-11 |  | -7.7843 |  | -7.7843 |

|         |                                                                                   |         |                                                                                    |         |
|---------|-----------------------------------------------------------------------------------|---------|------------------------------------------------------------------------------------|---------|
| HOMO-12 | 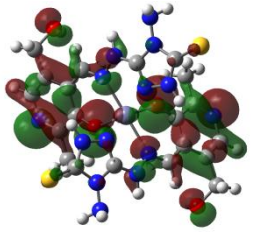 | -7.9620 |  | -7.9593 |
| HOMO-13 |  | -7.9949 |  | -7.9927 |

**Table S12.** Selected Frontier molecular orbitals HOMO-LUMO diagram of mercury(II) complex ( $\text{Hg}_2\text{L}_2$ ) in water and DMSO medium.

| Molecular orbital state | $\text{Hg}_2\text{L}_2$                                                             |         |                                                                                      |         |
|-------------------------|-------------------------------------------------------------------------------------|---------|--------------------------------------------------------------------------------------|---------|
|                         | Water medium                                                                        | E (eV)  | DMSO medium                                                                          | E (eV)  |
| LUMO+2                  | 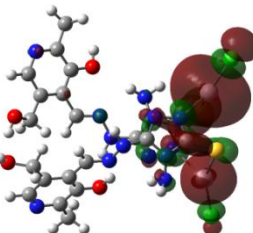 | -1.5017 |  | -1.5298 |
| LUMO+1                  |  | -1.7910 |  | -1.7962 |
| LUMO                    |  | -2.1739 |  | -2.1845 |



|        |                                                                                   |         |                                                                                    |         |
|--------|-----------------------------------------------------------------------------------|---------|------------------------------------------------------------------------------------|---------|
| HOMO   | 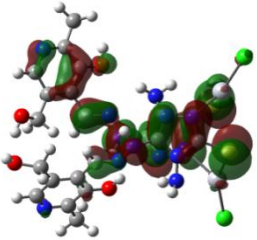 | -5.9682 |  | -5.9802 |
| HOMO-1 |  | -6.0643 |  | -6.0771 |

**Table S13.** Comparison with recent literature results.

| Zn <sup>2+</sup> and Hg <sup>2+</sup> sensors                                                                                                                                                                                                                                                                                                                                                                                                                                                                    | Sensing Medium          | LOD                                                               | Stoichiometry                                           | Application                                                                                                                  | Sensing mechanism | Ref. |
|------------------------------------------------------------------------------------------------------------------------------------------------------------------------------------------------------------------------------------------------------------------------------------------------------------------------------------------------------------------------------------------------------------------------------------------------------------------------------------------------------------------|-------------------------|-------------------------------------------------------------------|---------------------------------------------------------|------------------------------------------------------------------------------------------------------------------------------|-------------------|------|
| 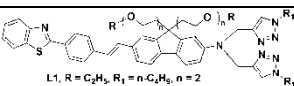<br>L1, R = C <sub>6</sub> H <sub>5</sub> , R <sub>1</sub> = n-C <sub>12</sub> H <sub>25</sub> , n = 2<br>L2, R = C <sub>6</sub> H <sub>5</sub> , R <sub>1</sub> = n-C <sub>11</sub> H <sub>23</sub> SH, n = 2<br>L3, R = CH <sub>3</sub> , R <sub>1</sub> = n-C <sub>11</sub> H <sub>23</sub> SH, n = 6-10<br>Hydrophilic bis(1,2,3-triazolyl)fluorene-based derivatives containing a 1,2,3-triazole-based recognition moiety | Ethanol                 | -                                                                 | 1:2 (L:Zn <sup>2+</sup> ) and 1:3 (L:Hg <sup>2+</sup> ) | Two-Photon based metal ion sensing.                                                                                          | ICT               | [11] |
| Fluorescence peptide-based sensor (Dansyl-His-Thr-Glu-His-Trp-NH <sub>2</sub> , D-P5)                                                                                                                                                                                                                                                                                                                                                                                                                            | Aqueous medium          | For Zn <sup>2+</sup> , 37.8 nM;<br>For Hg <sup>2+</sup> , 59.4 nM | 1:1 (L:Zn <sup>2+</sup> ) and L:Hg <sup>2+</sup> )      | This sensor also used for Cu <sup>2+</sup> ion. Real water sample application                                                | -                 | [12] |
| <br>BsOH                                                                                                                                                                                                                                                                                                                                                                                                                      | Methanol                | For Zn <sup>2+</sup> , 900 nM<br>For Hg <sup>2+</sup> , 290 nM    | -                                                       | This sensor also used for Cu <sup>2+</sup> ion. Real water sample application.                                               | Inhibition of PET | [13] |
| <br>Helical imide as fluorophore and a cyclen moiety as ionophore                                                                                                                                                                                                                                                                                                                                                              | HEPES (10 mM, pH = 7.2) | -                                                                 | 1:1 (L:Zn <sup>2+</sup> and L:Hg <sup>2+</sup> )        | This sensor also used for Cd <sup>2+</sup> ion. Distinguish three cations with the help of cysteine as an auxiliary reagent. | Inhibition of PET | [14] |

|                                                                                                                                                  |                                                          |                                                                  |                                                                             |                                                                                                                                                                         |                                                |      |
|--------------------------------------------------------------------------------------------------------------------------------------------------|----------------------------------------------------------|------------------------------------------------------------------|-----------------------------------------------------------------------------|-------------------------------------------------------------------------------------------------------------------------------------------------------------------------|------------------------------------------------|------|
| Fluorescent peptide dansyl-HPHGHW-NH <sub>2</sub> (dH3w)                                                                                         | MOPS (20 mM buffer, pH 7)                                | -                                                                | 2:1 (Peptide:Zn <sup>2+</sup> )<br>1:1 and 1:2, (Peptide/Hg <sup>2+</sup> ) | More efficient fluorescence peptidyl probes for Zn <sup>2+</sup> and Hg <sup>2+</sup> with unusual complexation mode                                                    | -                                              | [15] |
| 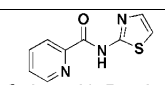<br>Carboxamide-Based probe                                     | ACN                                                      | -                                                                | 1:1 (L:Zn <sup>2+</sup> and L:Hg <sup>2+</sup> )                            | This sensor also used for Cd <sup>2+</sup> ion. The probe has low cytotoxicity with PC12 cells                                                                          | CHEF                                           | [16] |
| <br>Bisphenol A-rhodamine                                        | ACN-H <sub>2</sub> O (v/v=8/2, 5 mM, HEPES, pH 7.0)      | For Zn <sup>2+</sup> , 2210 nM<br>For Hg <sup>2+</sup> , 2160 nM | 1:2 (L:Zn <sup>2+</sup> and L:Hg <sup>2+</sup> )                            | Intracellular imaging in live cells (PC-3)                                                                                                                              | ESIPT and FRET                                 | [17] |
| <br>Phenolphthalein-fluorescein dye derivative (PF)             | EtOH-H <sub>2</sub> O (v/v = 8/2, 5 mM, HEPES, pH 7.0)   | For Zn <sup>2+</sup> , 540 nM<br>For Hg <sup>2+</sup> , 1160 nM  | 1:2 (L:Zn <sup>2+</sup> and L:Hg <sup>2+</sup> )                            | Determination of Zn <sup>2+</sup> and Hg <sup>2+</sup> in real water samples                                                                                            | Inhibition of ICT, FRET and -C=N isomerization | [18] |
| <br>Thiourea-bridging bis-tetraphenylethylene (Bis-TPE)        | H <sub>2</sub> O-THF solution (90 % of H <sub>2</sub> O) | For Zn <sup>2+</sup> , 82.2 nM<br>For Hg <sup>2+</sup> , 34.3 nM | 1:1 (L:Zn <sup>2+</sup> and L:Hg <sup>2+</sup> )                            | First examples for simultaneous detection of group IIB elements (Zn <sup>2+</sup> , Cd <sup>2+</sup> and Hg <sup>2+</sup> ). Test strips and cell-imaging applications. | AIE                                            | [19] |
| <br>((E)-2-methoxy-N-((quinolin-2-yl)methylene)aniline) (MQA) | DMSO-H <sub>2</sub> O solution (1/99 v/v)                | For Zn <sup>2+</sup> , 11 nM<br>For Hg <sup>2+</sup> , 40 nM     | 1:1 (L:Zn <sup>2+</sup> and L:Hg <sup>2+</sup> )                            | Reversible sensing with distinct emission response towards Zn <sup>2+</sup> and Hg <sup>2+</sup> .                                                                      | ICT and CHEF                                   | [20] |

|                                                                                      |                                                                                  |                                                                             |                                                               |                                                                                                                                                      |                                                                                     |           |
|--------------------------------------------------------------------------------------|----------------------------------------------------------------------------------|-----------------------------------------------------------------------------|---------------------------------------------------------------|------------------------------------------------------------------------------------------------------------------------------------------------------|-------------------------------------------------------------------------------------|-----------|
| <p>Rhodamine 6G condensed isophorone moiety (RHI)</p>                                | EtOH/H <sub>2</sub> O (8/2, v/v)                                                 | For Zn <sup>2+</sup> ,<br>82.2 nM<br>For Hg <sup>2+</sup> ,<br>1130 nM      | 2:1 (L:Zn <sup>2+</sup> )<br>and<br>1:1 (L:Hg <sup>2+</sup> ) | Real water samples and bio-imaging in DDL-1 cells.                                                                                                   | CHEF                                                                                | [21]      |
| <p>N-(naphthalen-1-yl)-2-(thiophene-2-carbonyl)hydrazine-1-carbothioamide (NTHC)</p> | Aqueous DMSO (For Zn <sup>2+</sup> ) and Bis-tris buffer (For Hg <sup>2+</sup> ) | For Zn <sup>2+</sup> ,<br>3170 nM<br>For Hg <sup>2+</sup> ,<br>4920 nM      | 1:1 (L:Zn <sup>2+</sup> and L:Hg <sup>2+</sup> )              | Bioimaging in Zebrafish (air bladder and eyes) and interestingly desulfurization reaction of thiourea to urea in case of Hg <sup>2+</sup> detection. | CHEF                                                                                | [22]      |
| <p>Thiocarbonohydrazone locked salicylidene based probe</p>                          | DMSO-HEPES buffer (9:1 v/v, pH 7.4)                                              | For Zn <sup>2+</sup> ,<br>99 nM<br>For Hg <sup>2+</sup> ,<br>14 nM          | 1:2 (L:Zn <sup>2+</sup> ) and<br>1:4 (L:Hg <sup>2+</sup> )    | Logic gate applications. Also applied to detect trace amount of S <sup>2-</sup> ions.                                                                | CHEF and inhibition of intramolecular PET                                           | [23]      |
| <p>Pyridoxal-AHMT</p>                                                                | HEPES buffered (pH = 8.0) (DMSO:water (1:1, v/v))                                | For Zn <sup>2+</sup> ,<br>522.50 nM<br>For Hg <sup>2+</sup> ,<br>1059.20 nM | 2:1 (L:Zn <sup>2+</sup> ) and<br>1:1 (L:Hg <sup>2+</sup> )    | Solid and solution state sensing, cell imaging application                                                                                           | CHEF (for Zn <sup>2+</sup> ) and CHEQ (for Hg <sup>2+</sup> ) and ESIPT suppression | This work |

## Reference

- [1] P. Kubelka, and F. Munk, *Z. Techn. Phys.*, 1931, **12**, 593 -601.
- [2] P. Makuła, M. Pacia, and W. Macyk, *J. Phys. Chem. Lett.*, 2018, **9**, 6814–6817.
- [3] Z. D. Hill, and M. Patrick, *J. Chem. Educ.*, 1986, **63**, 162-167.
- [4] G. S. Forbes, L. J. Heidt, and C. G. Boissonas, *J. Am. Chem. Soc.*, 1932, **54**, 960–973.
- [5] M. A. Spackman, and D. Jayatilaka, *CrystEngComm*, 2009, **11**, 19–32.
- [6] H. A. Benesi, and J. H. Hildebrand, *J. Am. Chem. Soc.*, 1949, **71**, 2703-2707.
- [7] S. Guo, C. Fan, G. Liu, and S. Pu, *RSC Adv.*, 2018, **8**, 39854–39864.
- [8] P. Purushothaman, and S. Karpagam, *ACS Omega*, 2022, **7**, 41361–41369.
- [9] M. A. Spackman, and J. J. McKinnon, *CrystEngComm*, 2002, **4**, 378-392.
- [10] H. Ferjani, H. Chebbi, A. Guesmi, O. S. AlRuqi, and S. A. Al-Hussain, *Crystals*, 2019, **9**, 2-10.
- [11] D. M. Nguyen, A. Frazer, L. Rodriguez, and K. D. Belfield, *Chem. Mater.*, 2010, **22**, 3472–3481.
- [12] L. Zhang, S. Yu, L. Gao, W. Meng, C. Fu, and L. Li, *Spectrosc. Lett.*, 2022, **55**, 488-499.
- [13] S. C. L. Pinheiro, I. M. Raimundo Jr, M. C. Moreno-Bondi, and G. Orellana, *Anal. Bioanal. Chem.*, 2010, **398**, 3127–3138.
- [14] M. Li, H.-Y. Lu, R.-L. Liu, J.-D. Chen, and C.-F. Chen, *J. Org. Chem.*, 2012, **77**, 3670–3673.
- [15] M. Siepi, R. Oliva, F. Battista, L. Petraccone, P. D. Vecchio, V. Izzo, F. D. Piaz, R. Isticato, E. Notomista, and G. Donadio, *Sensors*, 2020, **20**, 1-16.

- [16] M. Kiani, M. Bagherzadeh, S. Meghdadi, N. Rabiee, A. Abbasi, K. Shenk-Joß, M. Tahriri, L. Tayebi, and T. J. Webster, *New J. Chem.*, 2020, **44**, 11841-11852.
- [17] S. Erdemir, M. Yuksekogul, S. Karakurt, and O. Kocyigit, *Sens. Actuators B Chem.*, 2017, **241**, 230-238.
- [18] S. Erdemir, and O. Kocyigit, *Dyes Pigm.*, 2017, **145**, 72-79.
- [19] S. Jiang, S. Chen, Z. Wang, H. Guoa, and F. Yang, *Sens. Actuators B Chem.*, 2020, **308**, 127734.
- [20] Y. Dong, R. Fan, W. Chen, P. Wang, and Y. Yang, *Dalton Trans.*, 2017, **46**, 6769-6775.
- [21] S. Erdemir, and S. Malkondu, *J. Mol. Liq.*, 2021, **326**, 115279.
- [22] H. Kim, M. Lee, J. J. Lee, E. K. Min, K. -T. Kim, and C. Kim, *J. Photochem. Photobiol. A: Chem.*, 2022, **428**, 113882.
- [23] S. K. Padhan, J. Palei, P. Rana, N. Murmu, and S. N. Sahu, *Spectrochim. Acta A Mol.*, 2019, **208**, 271-284.
